# Supplementary material for: White matter myelination during early infancy is linked to spatial gradients and myelin content at birth
Source: PubMed Central journal article supplement (PMC8863985; doi:10.1038/s41467-022-28326-4), 2022-02-22

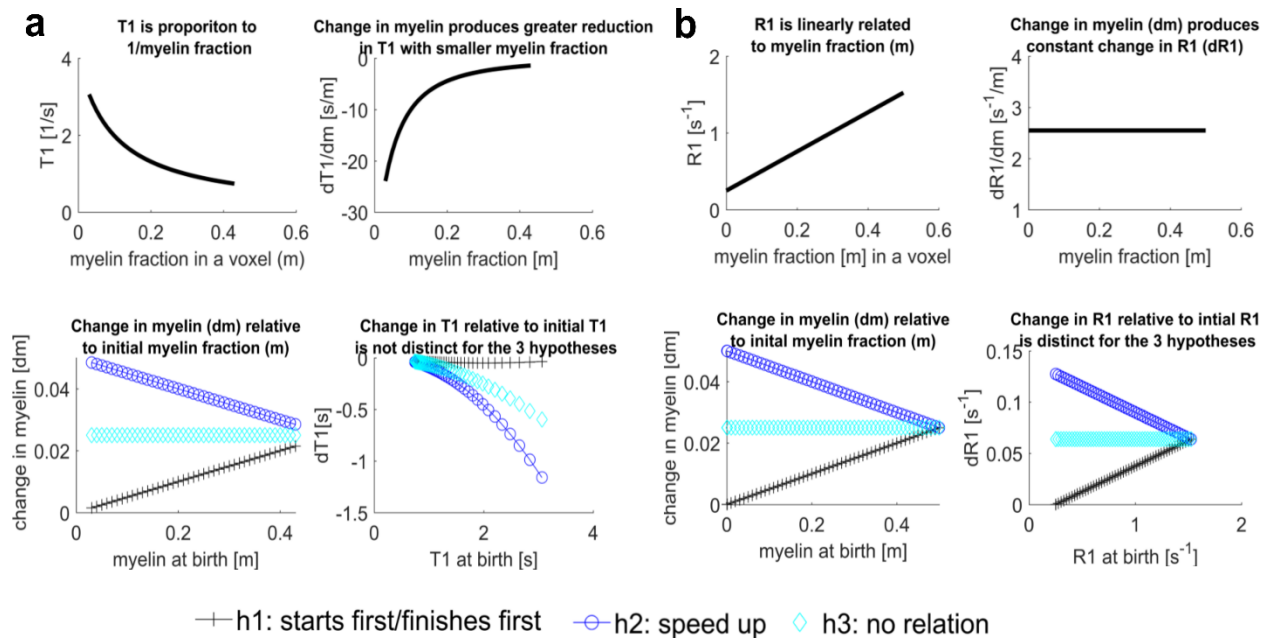

**Supplementary Figure 1.** Quantitative MRI measures of R1 (b) but not T1 (a) are linearly related to myelin content. As such, R1 is a suitable metric to distinguish between developmental hypotheses.

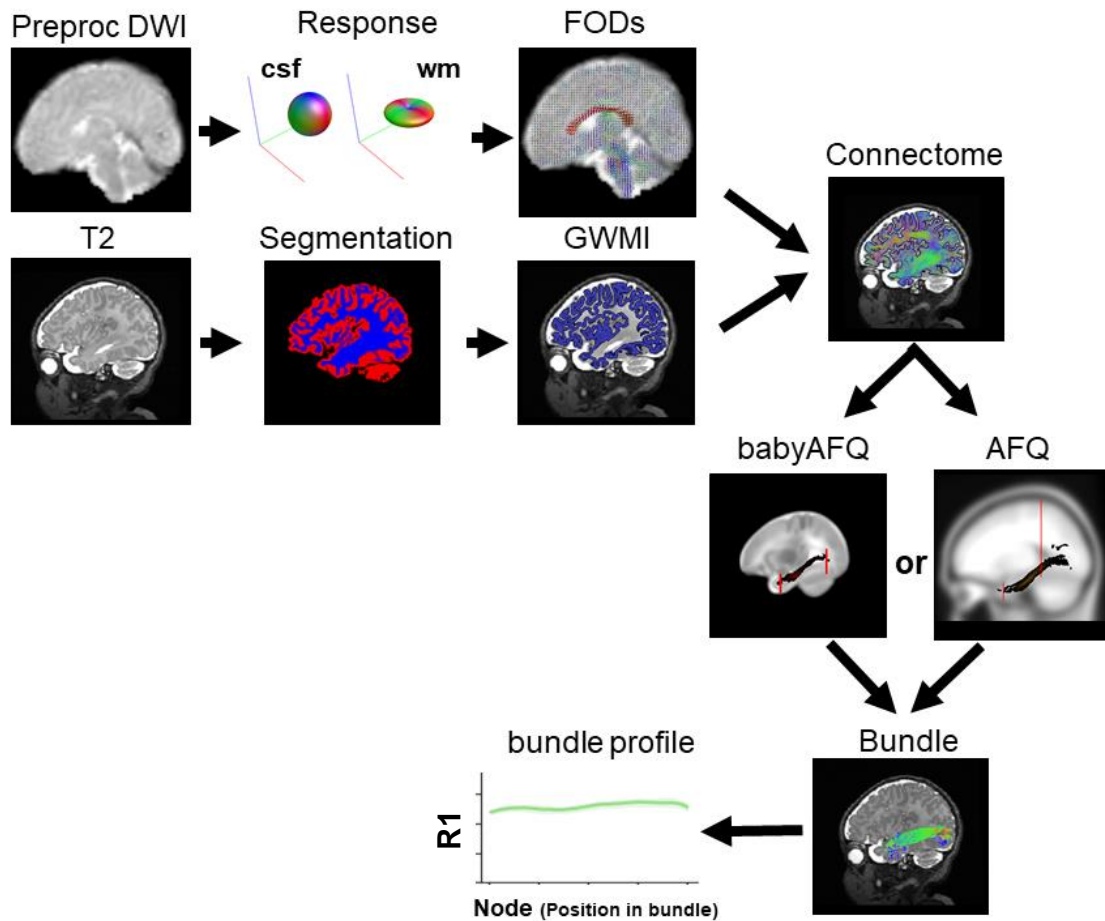

**Supplementary Figure 2.** A schematic representation of our processing pipeline. DMRI data is preprocessed and fiber density functions (FODs) are generated separately for white matter and CSF using multi-shell/multi-tissue constrained spherical deconvolution (CSD). A tissue segmentation is generated from anatomical data and used for anatomically constrained tractography (ACT). Seeds for tractography are placed at the gray/white matter interface (GWMI) and whole brain connectomes with 2 million streamlines are created for each infant and timepoint. Bundles are delineated from the whole brain connectome using either babyAFQ, which was developed here and optimized for infant data or AFQ, which was developed from adult data and serves as a benchmark. R1 development is then evaluated across the length of each bundle identified with babyAFQ.

### Improvements by implementation of infant template

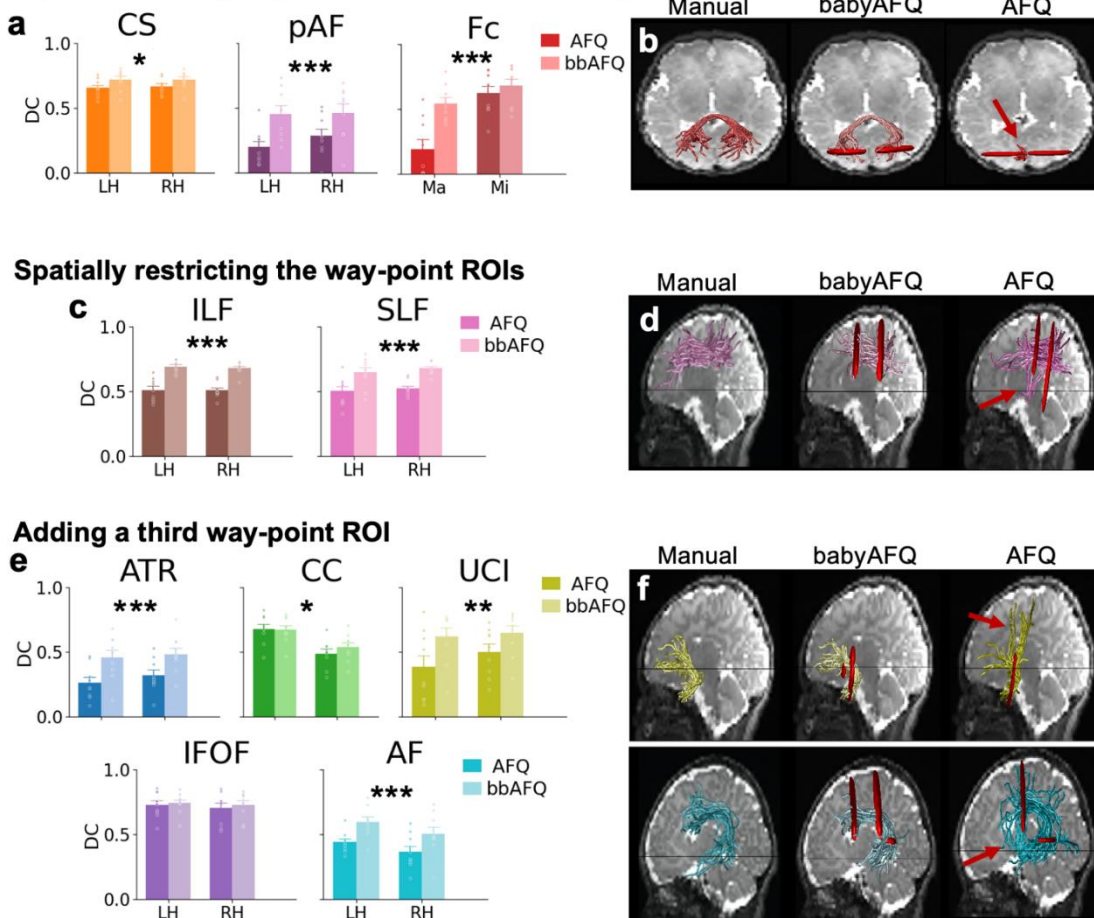

**Supplementary Figure 3.** Adapting AFQ for the infant brain (babyAFQ) improves the identification of white matter bundles in newborns. Infant-specific adaptations included the usage of an infant template brain for definition of way-point ROIs for all tracts, spatially restricted way-point ROIs for the ILF and SLF and the introduction of a third way-point ROIs for “curvy” bundles. a,c,e: Bar graphs compare AFQ and babyAFQ to manually delineated “gold-standard” bundles in newborns (N=9). Higher dice coefficients (DCs) indicate more spatial overlap with manual tracts. Repeated measures ANOVAs (factors: AFQ and hemisphere / anteriority) show main effect of AFQ for most bundles: CS:  $F(8)=11.45$ ,  $p=0.01$ , pAF:  $F(8)=56.82$ ,  $p=0.0001$ , Fc:  $F(8)=20.80$ ,  $p=0.0007$ , ILF:  $F(8)=159.63$ ,  $p<0.0001$ , SLF:  $F(8)=99.46$ ,  $p<0.0001$ , ATR:  $F(8)=123.11$ ,  $p<0.0001$ , CC:  $F(8)=9.70$ ,  $p=0.01$ , UCI:  $F(8)=21.34$ ,  $p=0.008$ , IFOF:  $F(8)=1.06$ ,  $p=0.33$ , AF:  $F(8)=36.25$ ,  $p=0.0003$ . Bars show mean DCs  $\pm$  SEM. \* $p<0.05$ , \*\* $p<0.01$ , \*\*\* $p<0.001$ . Circles indicate individual infants’ data. b,d,f: Examples of bundles delineated manually as well as with AFQ and babyAFQ presented in individual subject’s left hemisphere. Abbreviations: LH: left hemisphere, RH: right hemisphere, CS: cortico-spinal tract, pAF: posterior arcuate fasciculus, Fc: forceps (Ma=forceps major; Mi=forceps minor), ILF: inferior longitudinal fasciculus, SLF: superior longitudinal fasciculus, ATR: anterior thalamic radiation, CC: cingulum cingulate, UCI: uncinate fasciculus, IFOF: inferior frontal occipital fasciculus, AF: arcuate fasciculus.

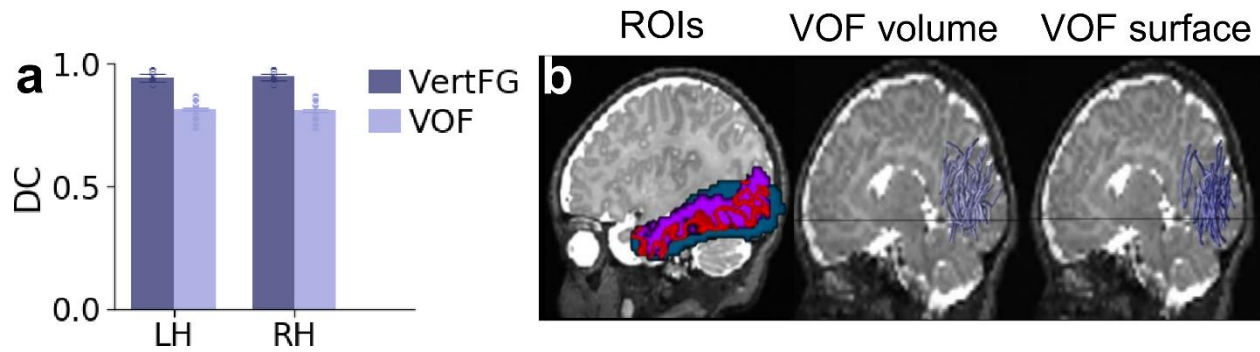

**Supplementary Figure 4.** Tracts identified as being part of the VOF are similar regardless of whether surface or volume waypoint ROIs are used. While AFQ uses surface ROIs to define the VOF, babyAFQ offers both surface and volume ROIs to define this bundle, as to date it is difficult to generate cortical surfaces in infants. a. Bar graph shows DC for tracts identified using surface ROIs and volume ROIs. Dark bars indicate overlap of all vertical tracts and light bars indicate overlap of the VOF bundle identified with both approaches. Bars show mean DC  $\pm$  SEM separately for both hemispheres. Circles indicate individual infants' data. b. ROIs and identified VOF bundles in an example subject. Left panel: purple outline shows an example surface ROI, blue box shows an example volume ROI and red outline indicates gray-white matter interface within volume ROI. Middle panel: VOF identified using a volume ROI. Right panel: VOF identified using a surface ROI. Abbreviations: LH: left hemisphere, RH: right hemisphere, VertFG: vertical fiber group, VOF: vertical occipital fasciculus.

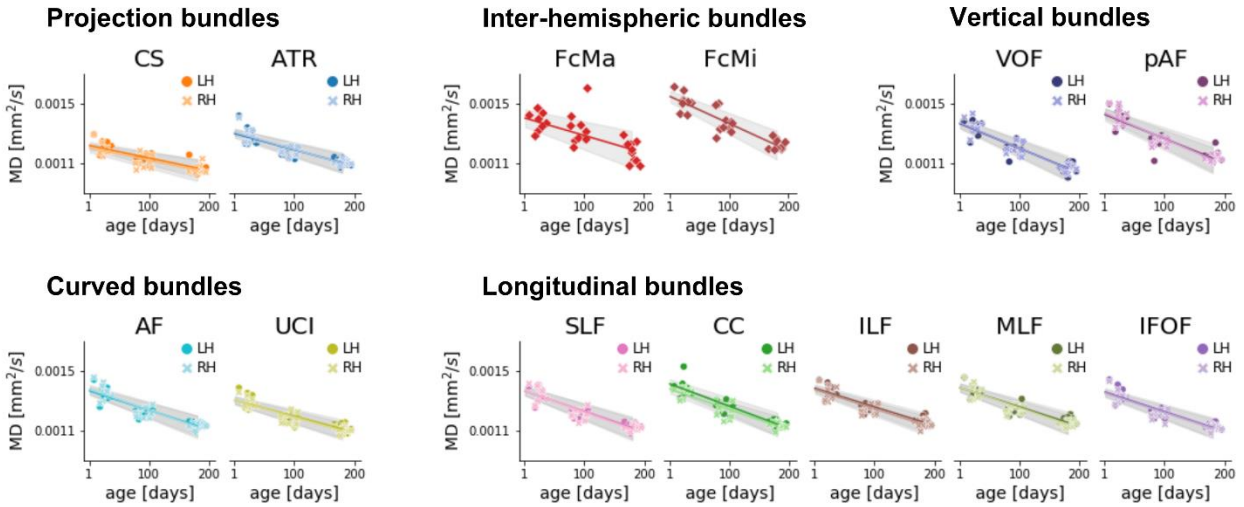

**Supplementary Figure 5.** MD of white matter bundles linearly decreases from birth to 6 months of age. Mean MD of each bundle as a function of age in days. Each point is a participant; markers indicate hemisphere; lines indicate LMM prediction; lines for both hemispheres fall on top of each other; gray shaded regions indicate 95% confidence intervals. Abbreviations: MD: mean diffusivity, LH: left hemisphere, RH: right hemisphere, CS: cortico-spinal tract, ATR: anterior thalamic radiation, FcMa: forceps major; FcMi: forceps minor, VOF: vertical occipital fasciculus, pAF: posterior arcuate fasciculus, AF: arcuate fasciculus, UCI: uncinate fasciculus, SLF: superior longitudinal fasciculus, CC: cingulum cingulate, ILF: inferior longitudinal fasciculus, MLF: middle longitudinal fasciculus, IFOF: inferior frontal occipital fasciculus.

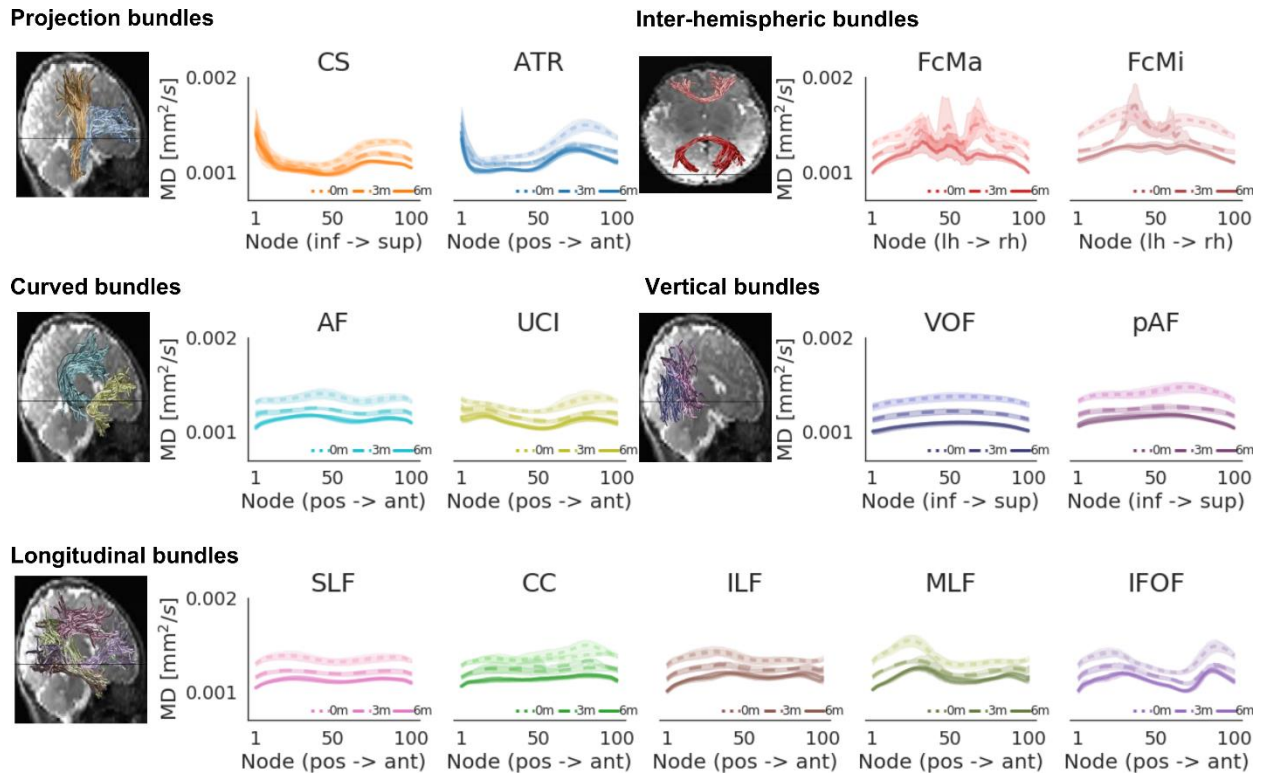

**Supplementary Figure 6.** Development of MD along each bundle. Mean MD across infants is displayed in both hemispheres (lines for the two hemispheres fall on top of each other) along the length of each bundle in newborns (0m, dotted line), 3-months-olds (3m, dashed line), and 6-months-olds (6m, solid line). Shaded regions: 95% confidence intervals. Left panels show the bundles in a representative newborn. Abbreviations: MD: mean diffusivity, CS: cortico-spinal tract, ATR: anterior thalamic radiation, FcMa: forceps major; FcMi: forceps minor, VOF: vertical occipital fasciculus, pAF: posterior arcuate fasciculus, AF: arcuate fasciculus, UCI: uncinate fasciculus, SLF: superior longitudinal fasciculus, CC: cingulum cingulate, ILF: inferior longitudinal fasciculus, MLF: middle longitudinal fasciculus, IFOF: inferior frontal occipital fasciculus.

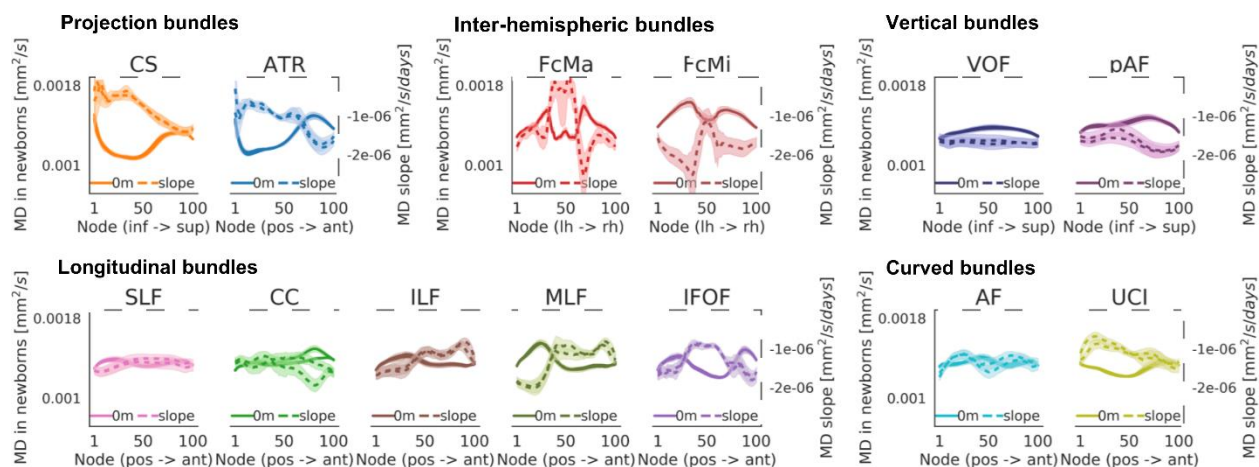

**Supplementary Figure 7.** MD development rate varies along the length of each bundle. Each panel jointly shows the measured MD in newborns (left y axis, solid line) and the slope of MD development (right y axis, dashed line) at each node along the bundle. Faster development (more negative slope) corresponds to lower values of dashed lines. Higher MD in newborns correspond to higher values in solid lines. Lines from both hemispheres are presented separately but fall on top of each other. Shaded regions indicate standard error of measured MD in newborns or slope of MD development, respectively. Abbreviations: MD: mean diffusivity, CS: cortico-spinal tract, ATR: anterior thalamic radiation, FcMa: forceps major; FcMi: forceps minor, VOF: vertical occipital fasciculus, pAF: posterior arcuate fasciculus, AF: arcuate fasciculus, UCI: uncinate fasciculus, SLF: superior longitudinal fasciculus, CC: cingulum cingulate, ILF: inferior longitudinal fasciculus, MLF: middle longitudinal fasciculus, IFOF: inferior frontal occipital fasciculus.

**Supplementary Figure 8.** BabyAFQ successfully identifies all bundles in all infants and timepoints. On the following pages, we show each individual's bundles identified with babyAFQ as well as AFQ and manually (where applicable). Data is sorted by bundle. Bundles identified with babyAFQ show the expected spatial extent and trajectory across all participants.



# Left Anterior Thalamic Radiation Newborn

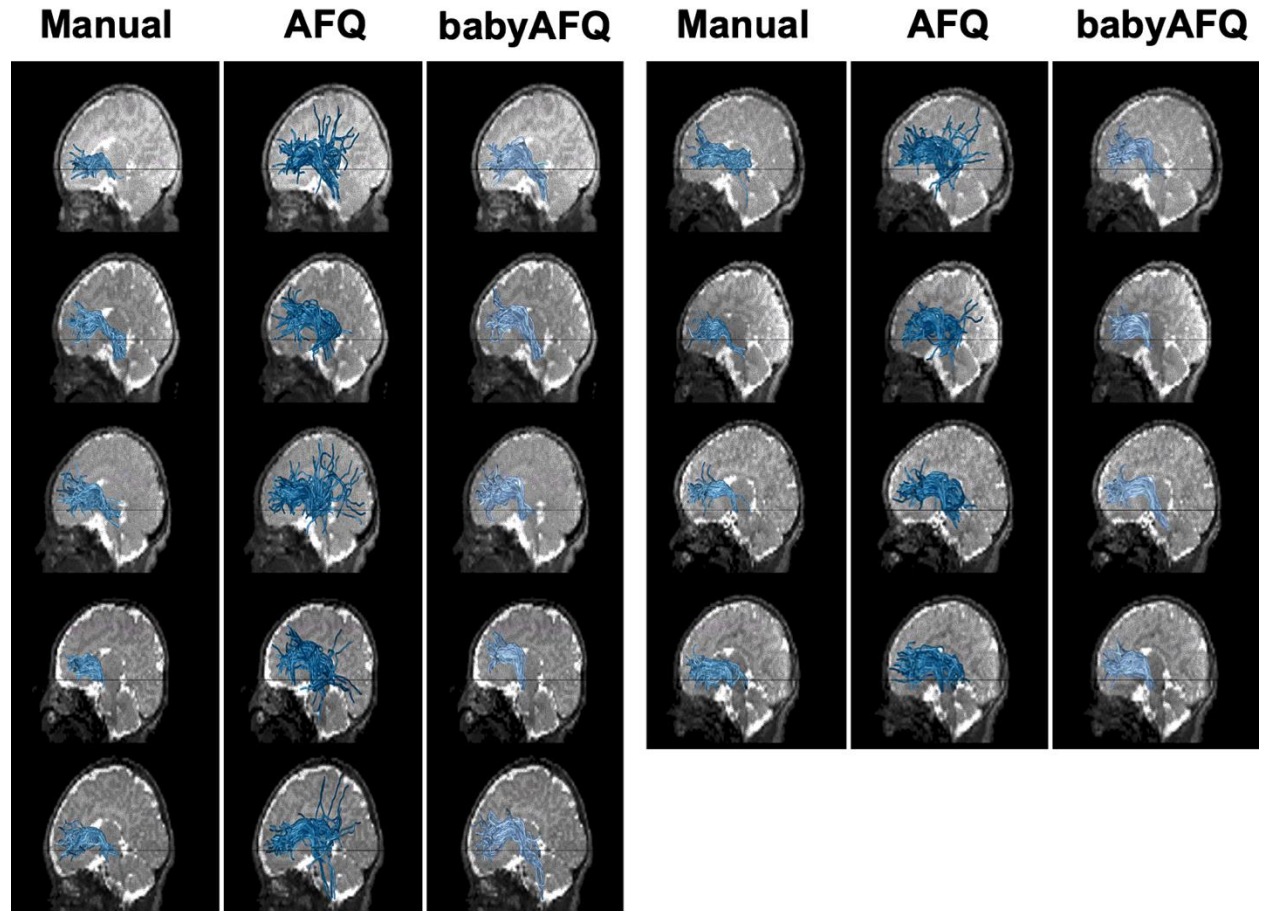

# Left Anterior Thalamic Radiation

3 months

6 months

AFQ babyAFQ AFQ babyAFQ AFQ babyAFQ AFQ babyAFQ

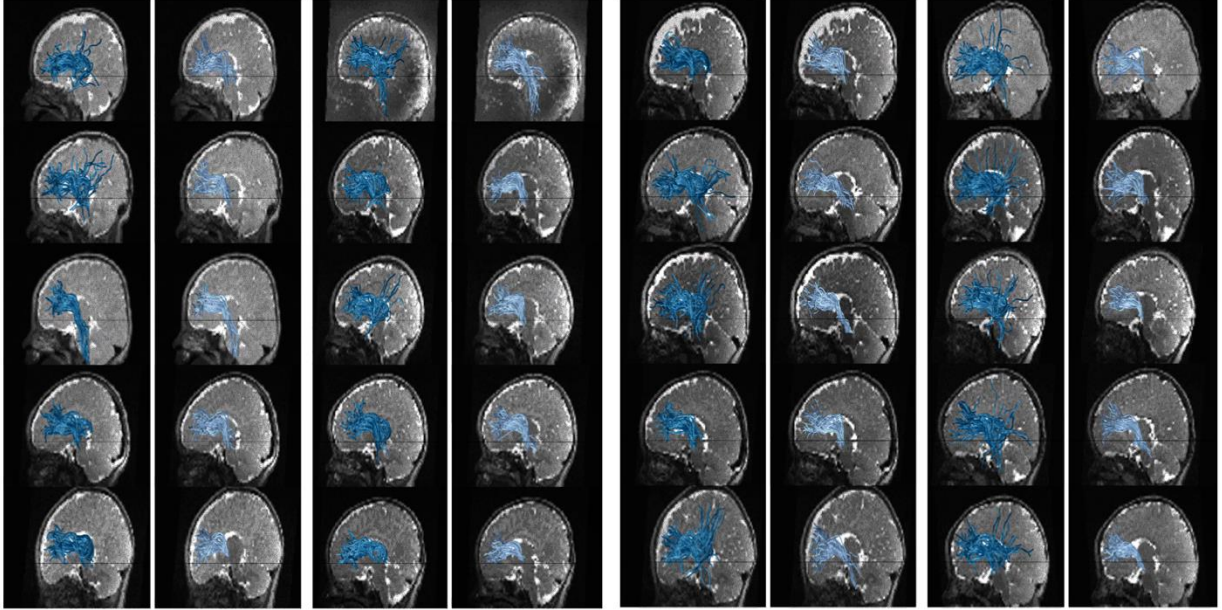

# Right Anterior Thalamic Radiation Newborn

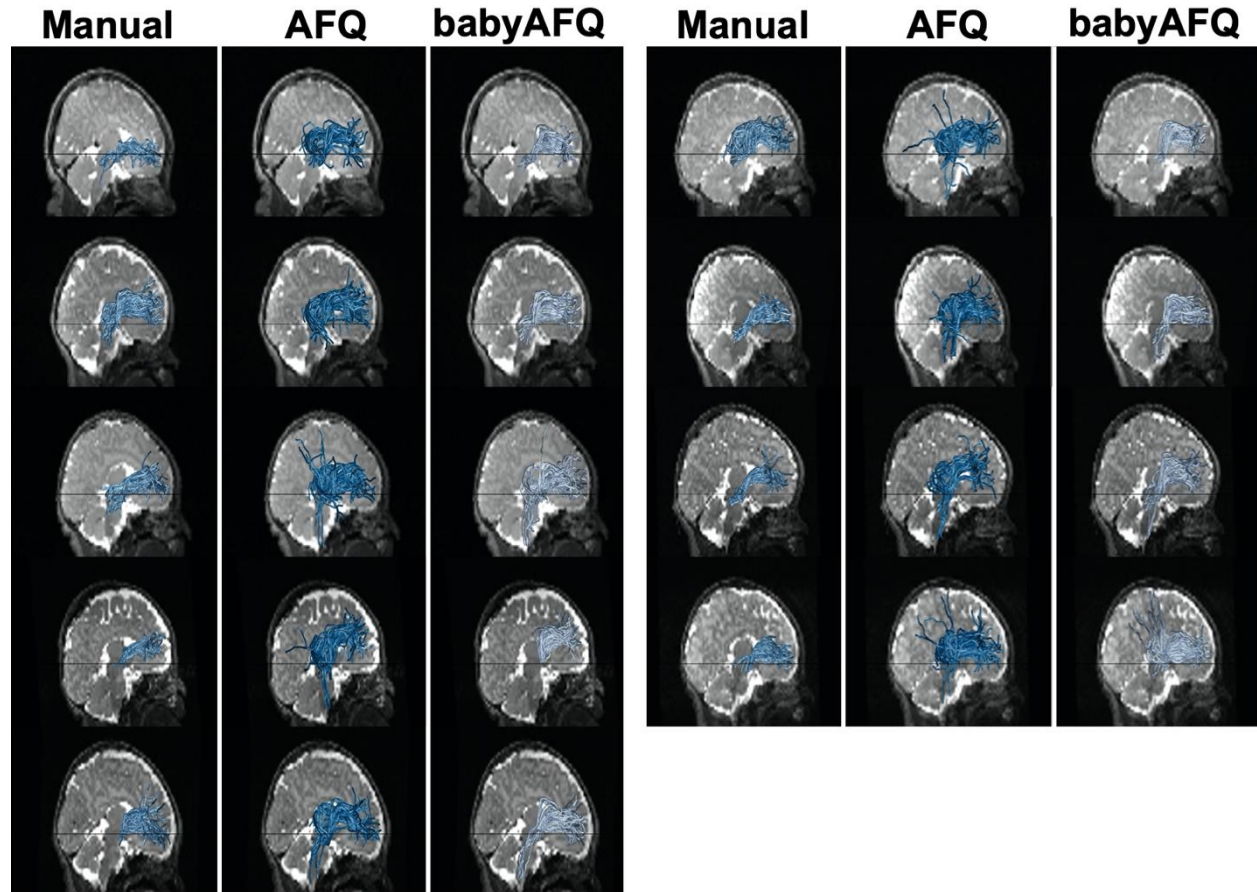

# Right Anterior Thalamic Radiation

3 months

6 months

AFQ babyAFQ AFQ babyAFQ AFQ babyAFQ AFQ babyAFQ

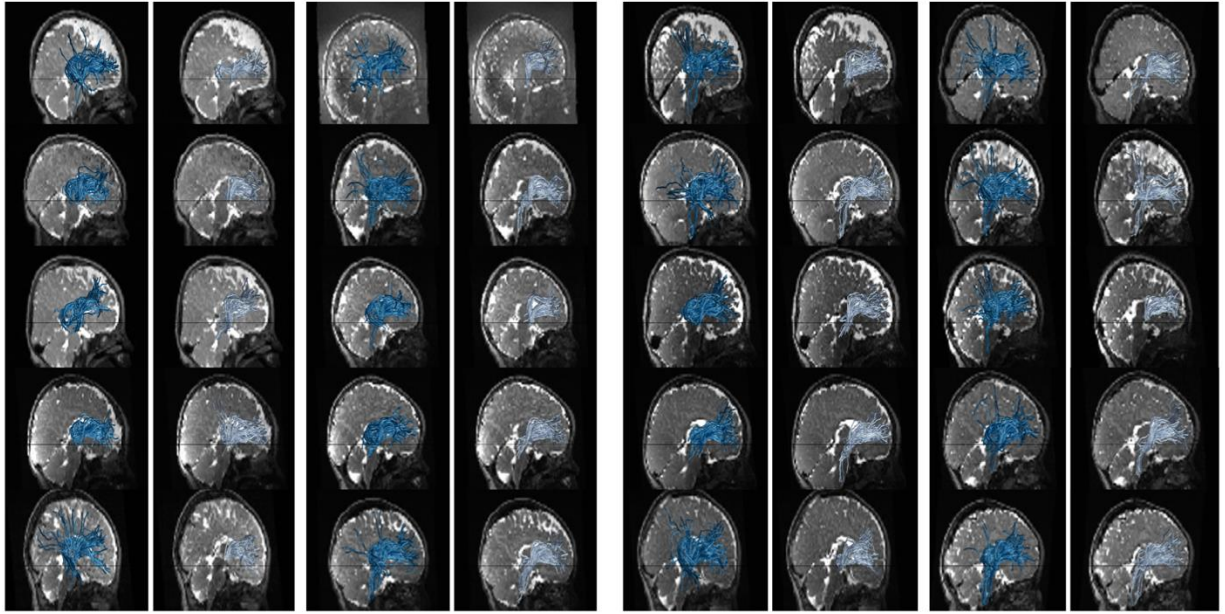

# Left Corticospinal Tract Newborn

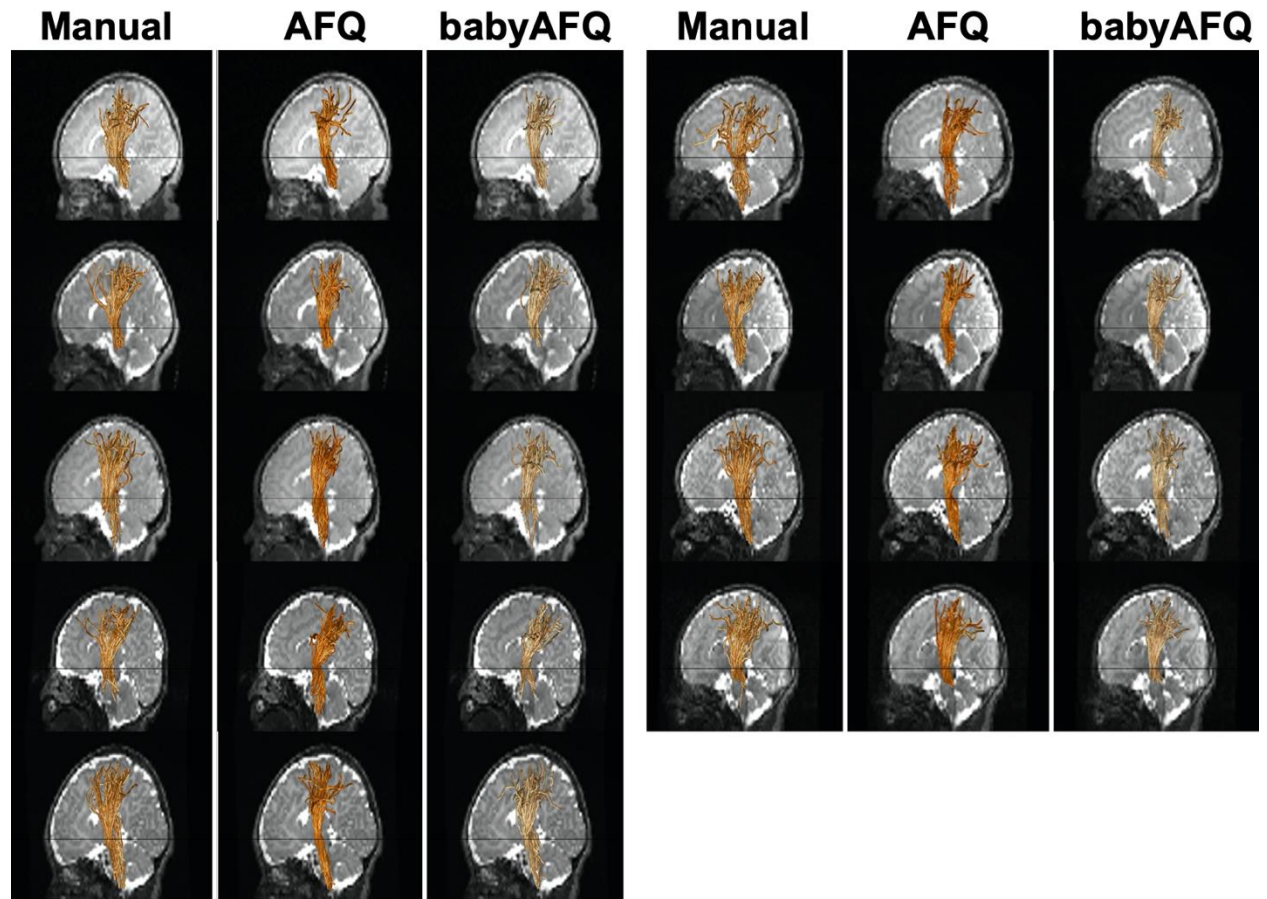

# Left Corticospinal Tract

3 months

6 months

AFQ babyAFQ AFQ babyAFQ AFQ babyAFQ AFQ babyAFQ

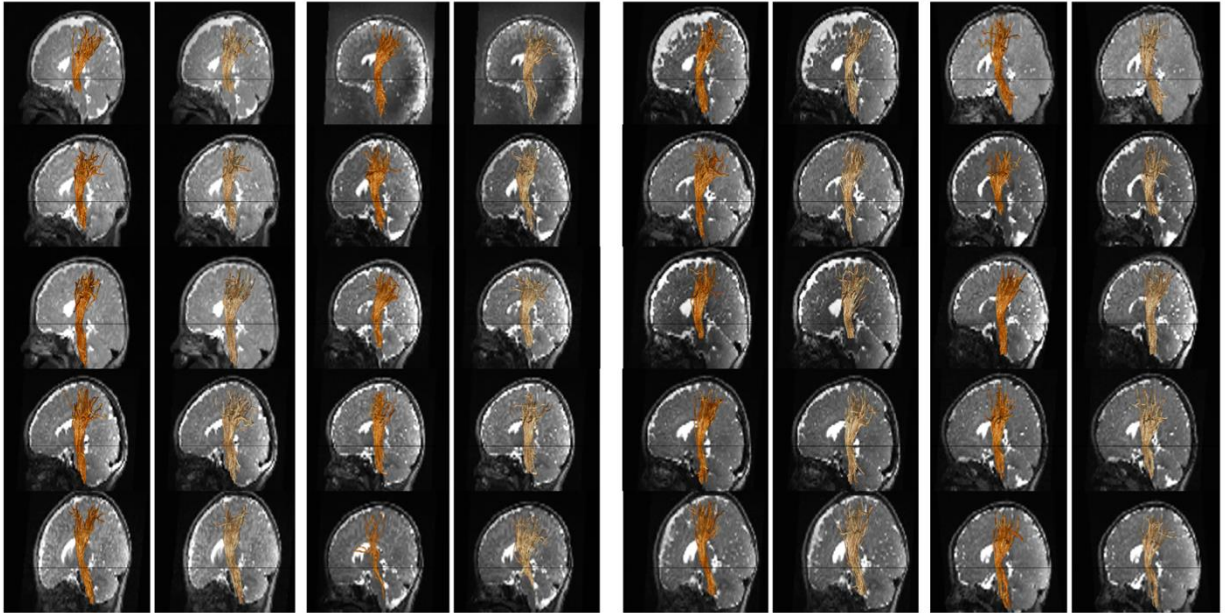

# Right Corticospinal Tract Newborn

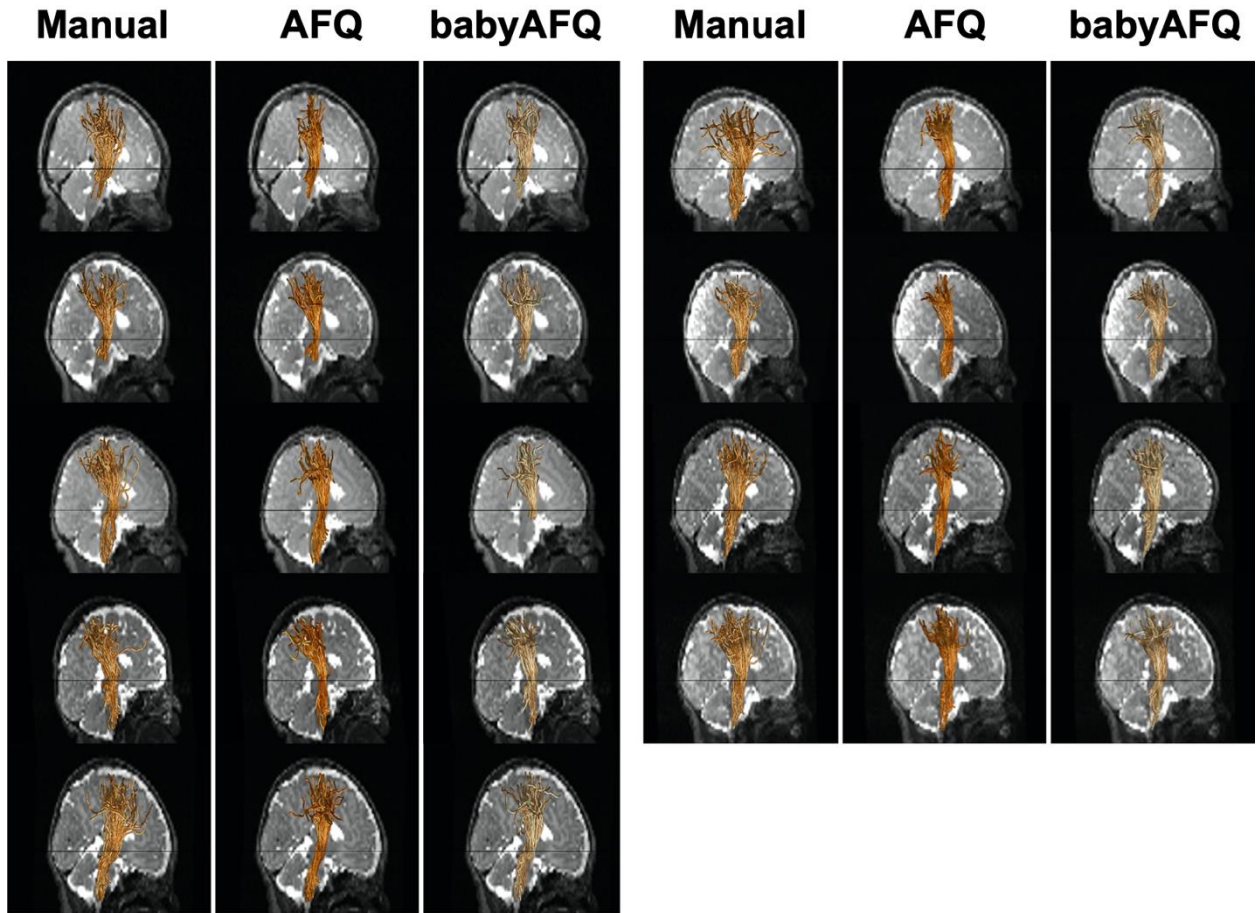

# Right Corticospinal Tract

3 months

6 months

AFQ babyAFQ AFQ babyAFQ AFQ babyAFQ AFQ babyAFQ

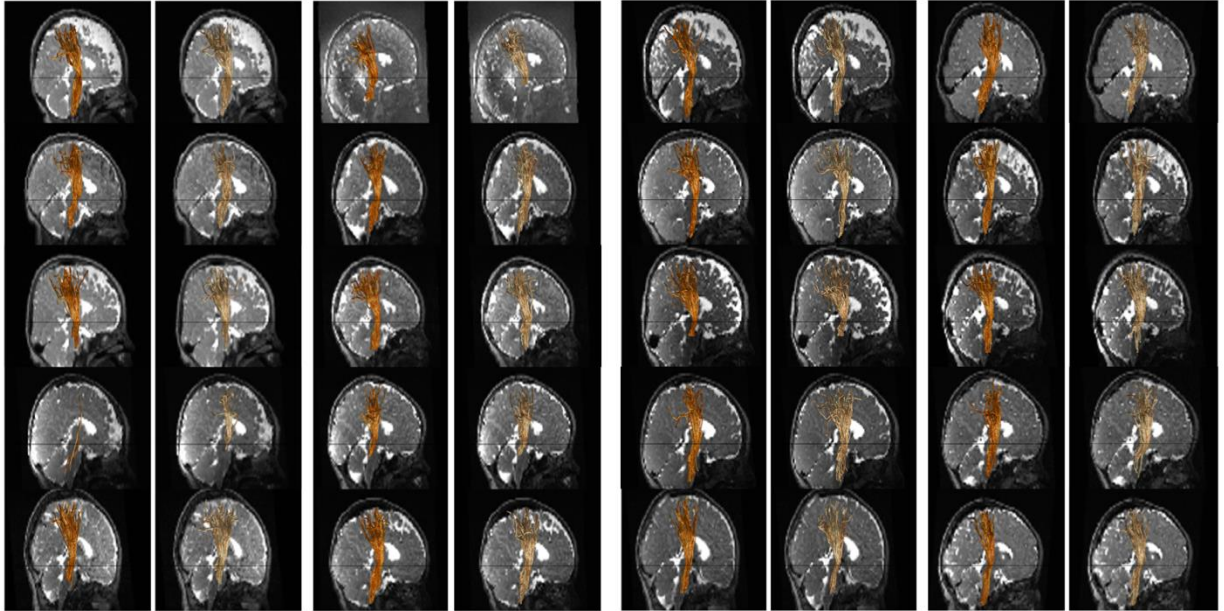



# Left Cingulum Cingulate Newborn

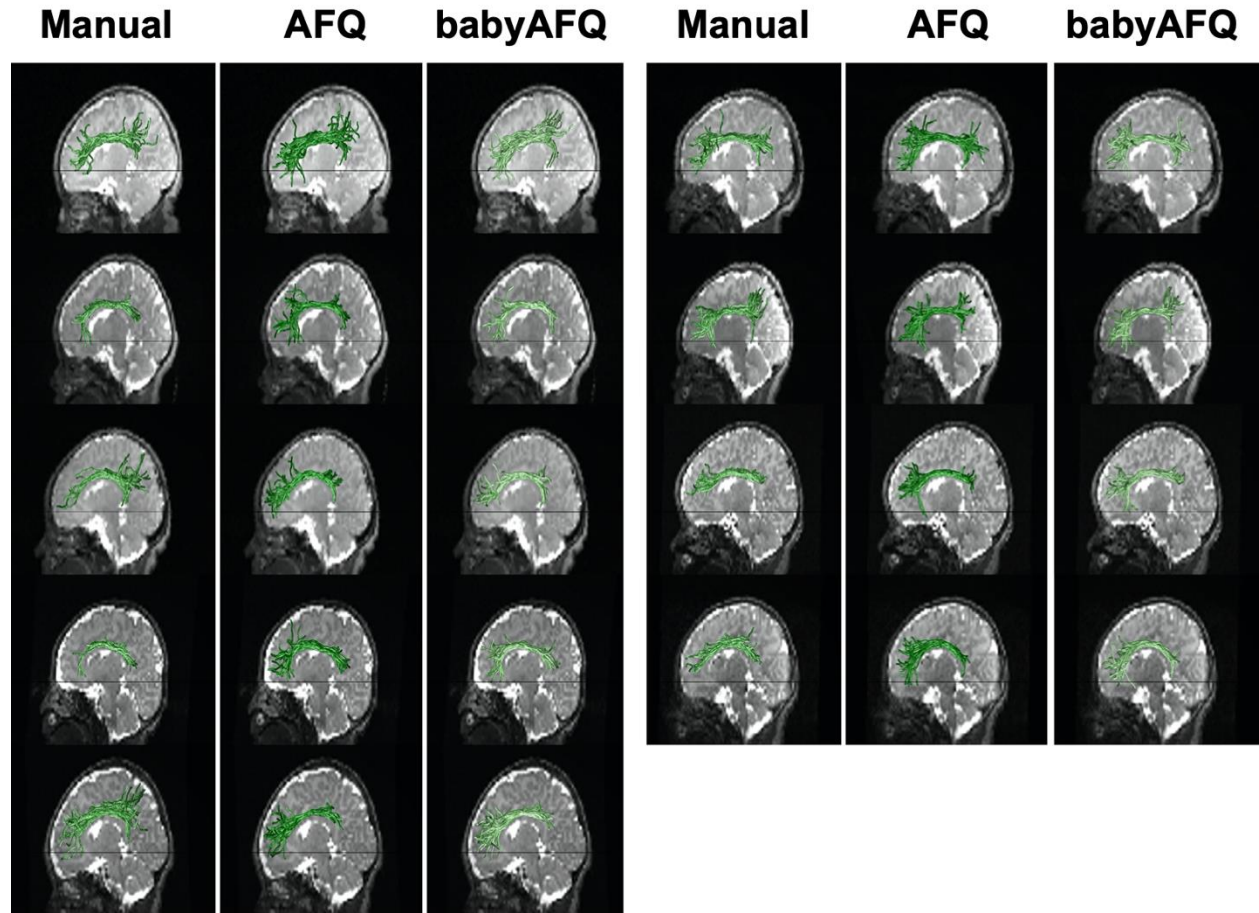

# Left Cingulum Cingulate

3 months

6 months

AFQ babyAFQ AFQ babyAFQ AFQ babyAFQ AFQ babyAFQ

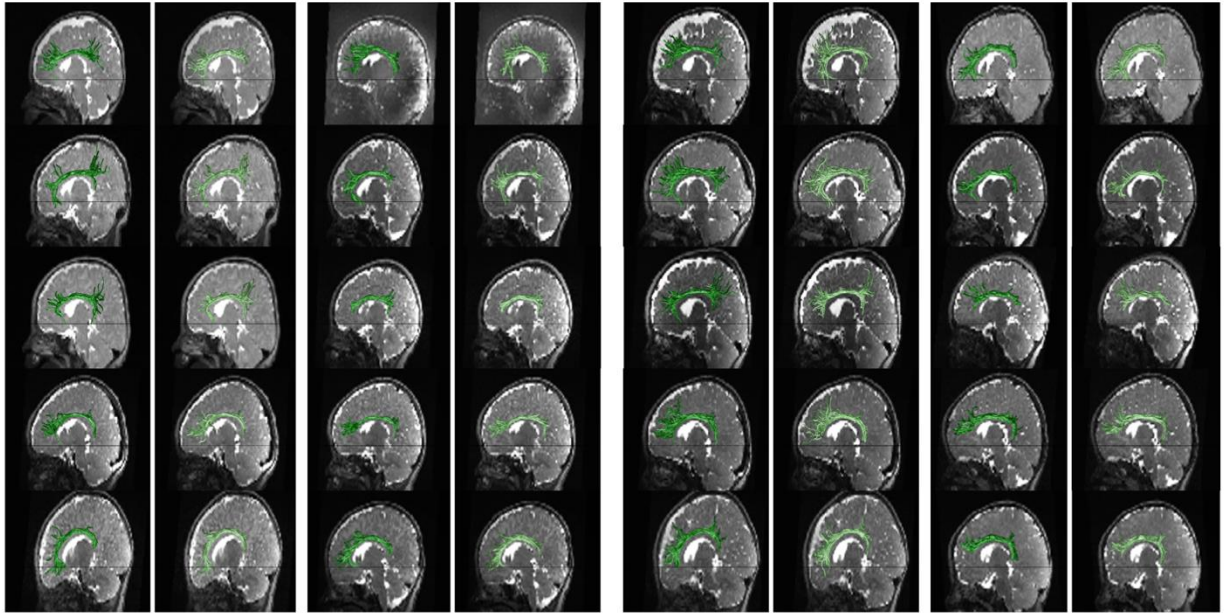

# Right Cingulum Cingulate Newborn

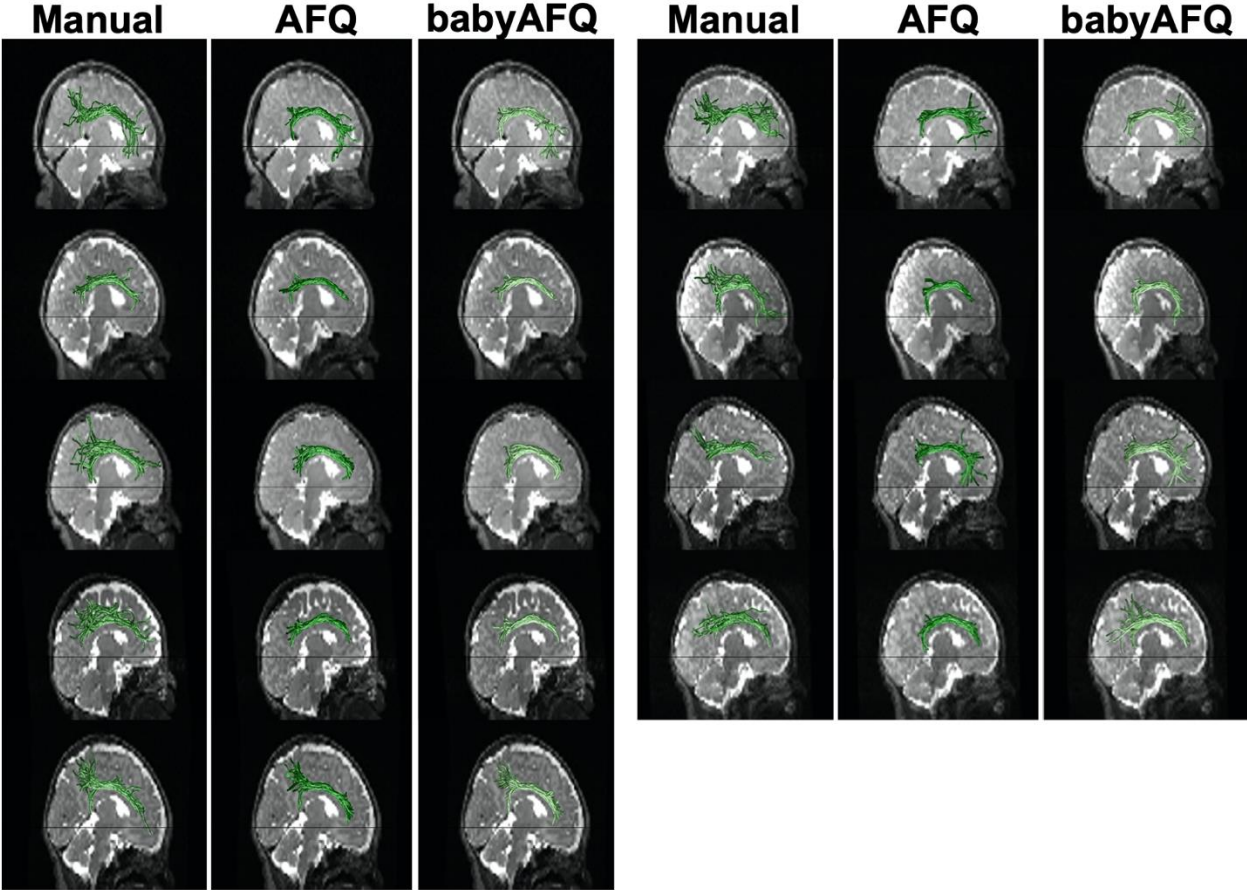

# Right Cingulum Cingulate

3 months

6 months

AFQ babyAFQ AFQ babyAFQ AFQ babyAFQ AFQ babyAFQ

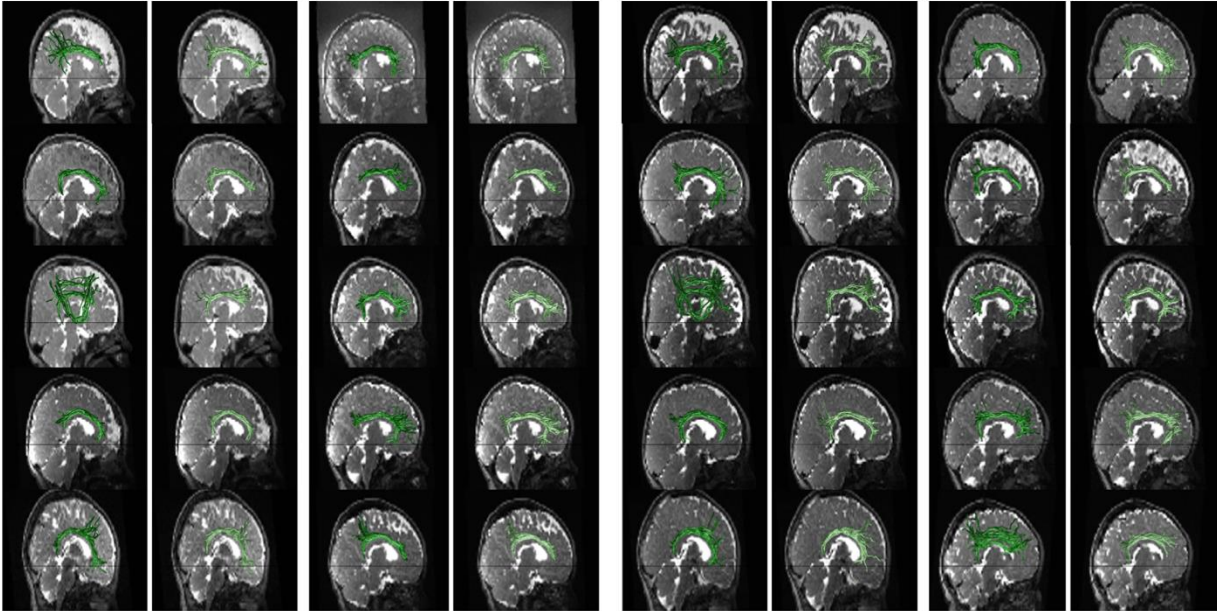

# Forceps Major Newborn

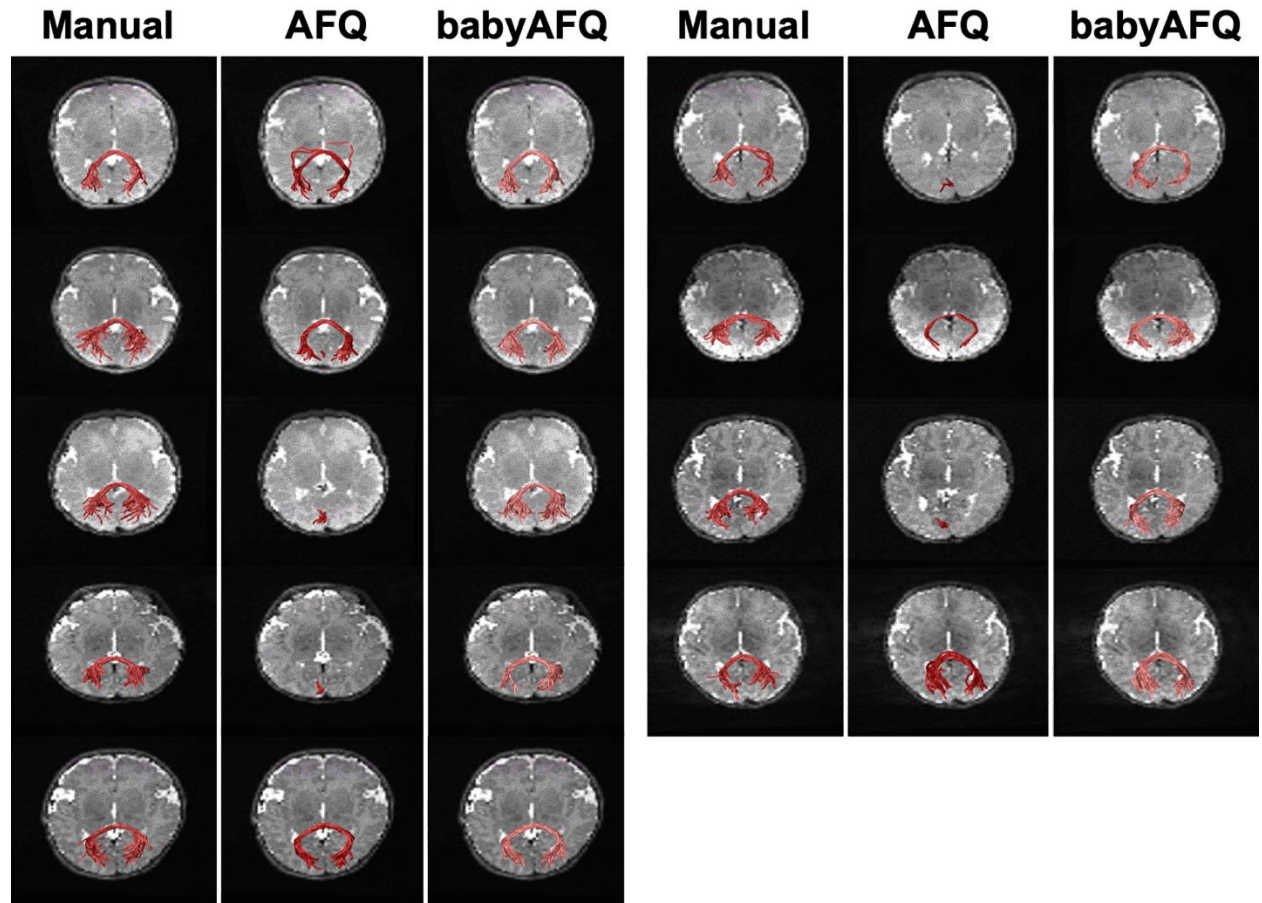

# Forceps Major

3 months

6 months

AFQ babyAFQ AFQ babyAFQ AFQ babyAFQ AFQ babyAFQ

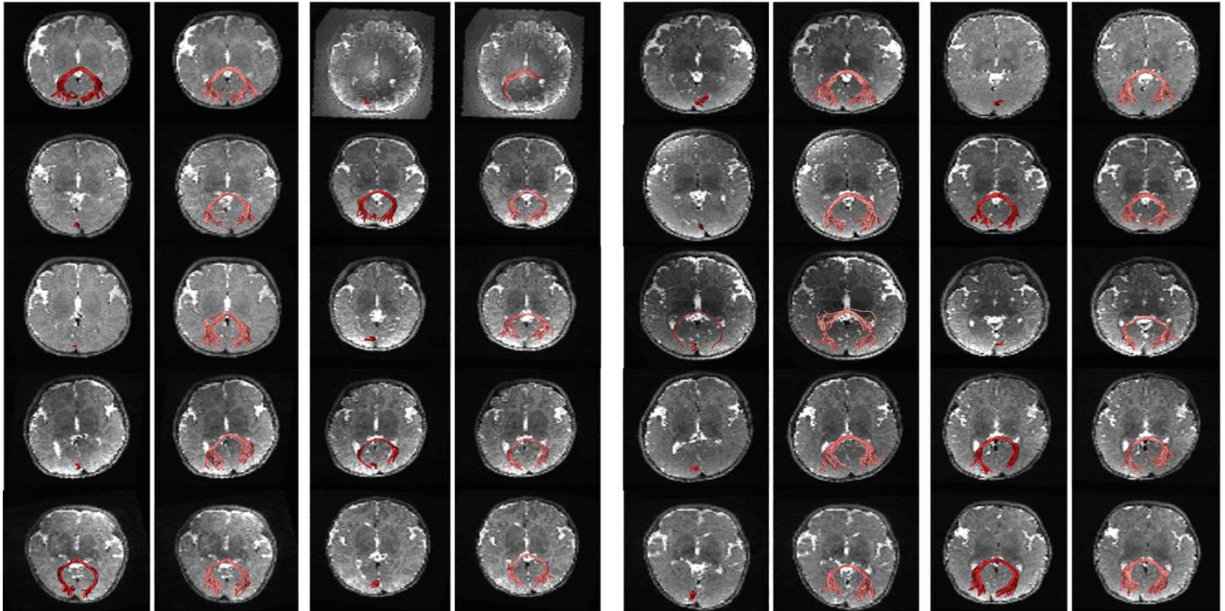

# Forceps Minor Newborn

Manual

AFQ

babyAFQ

Manual

AFQ

babyAFQ

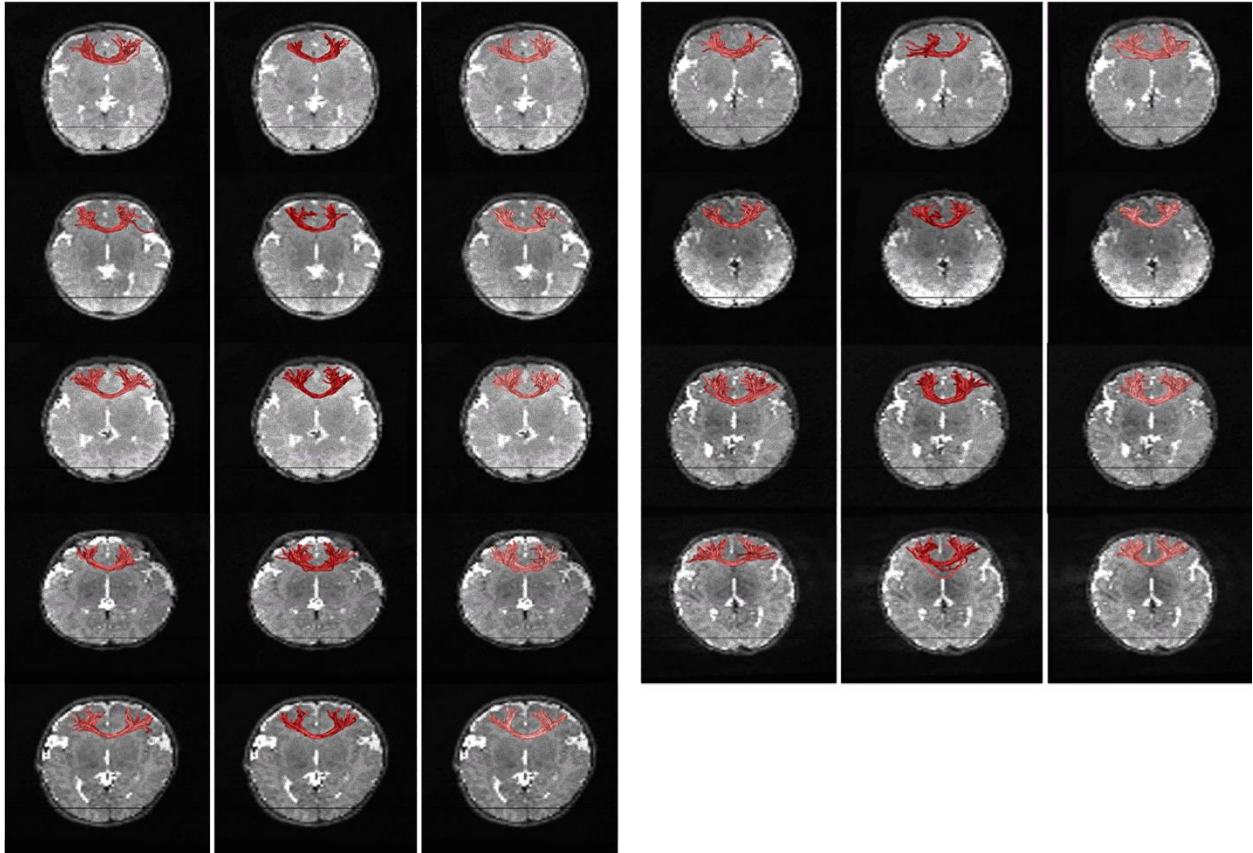

# Forceps Minor

3 months

6 months

AFQ babyAFQ AFQ babyAFQ AFQ babyAFQ AFQ babyAFQ

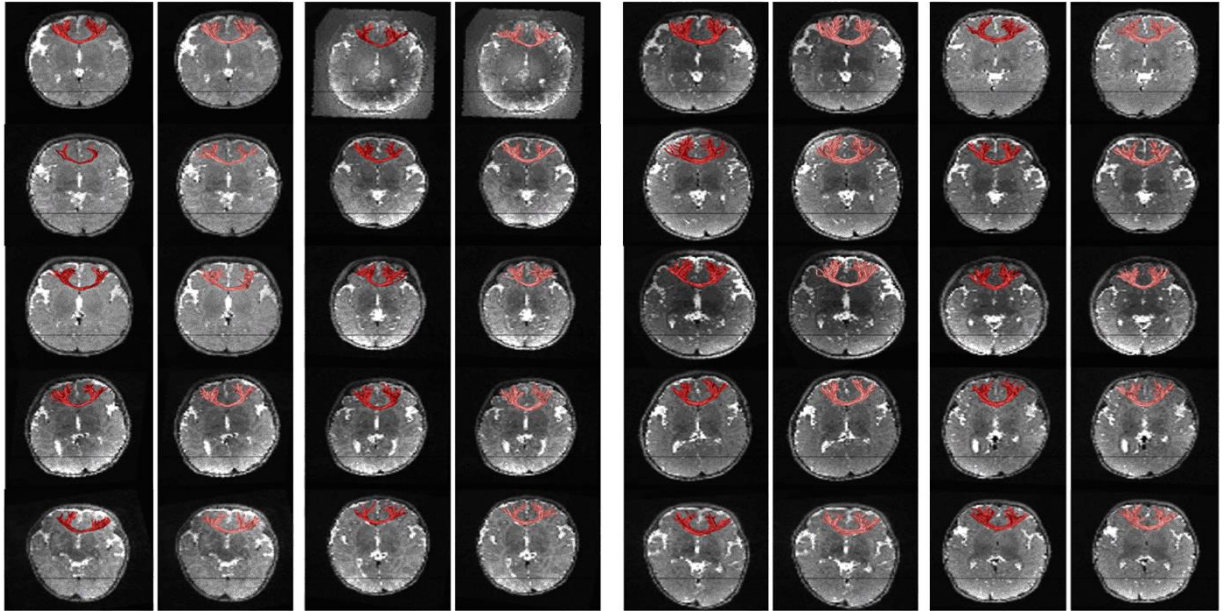



# Left Inferior Frontal Occipital Fasciculus Newborn

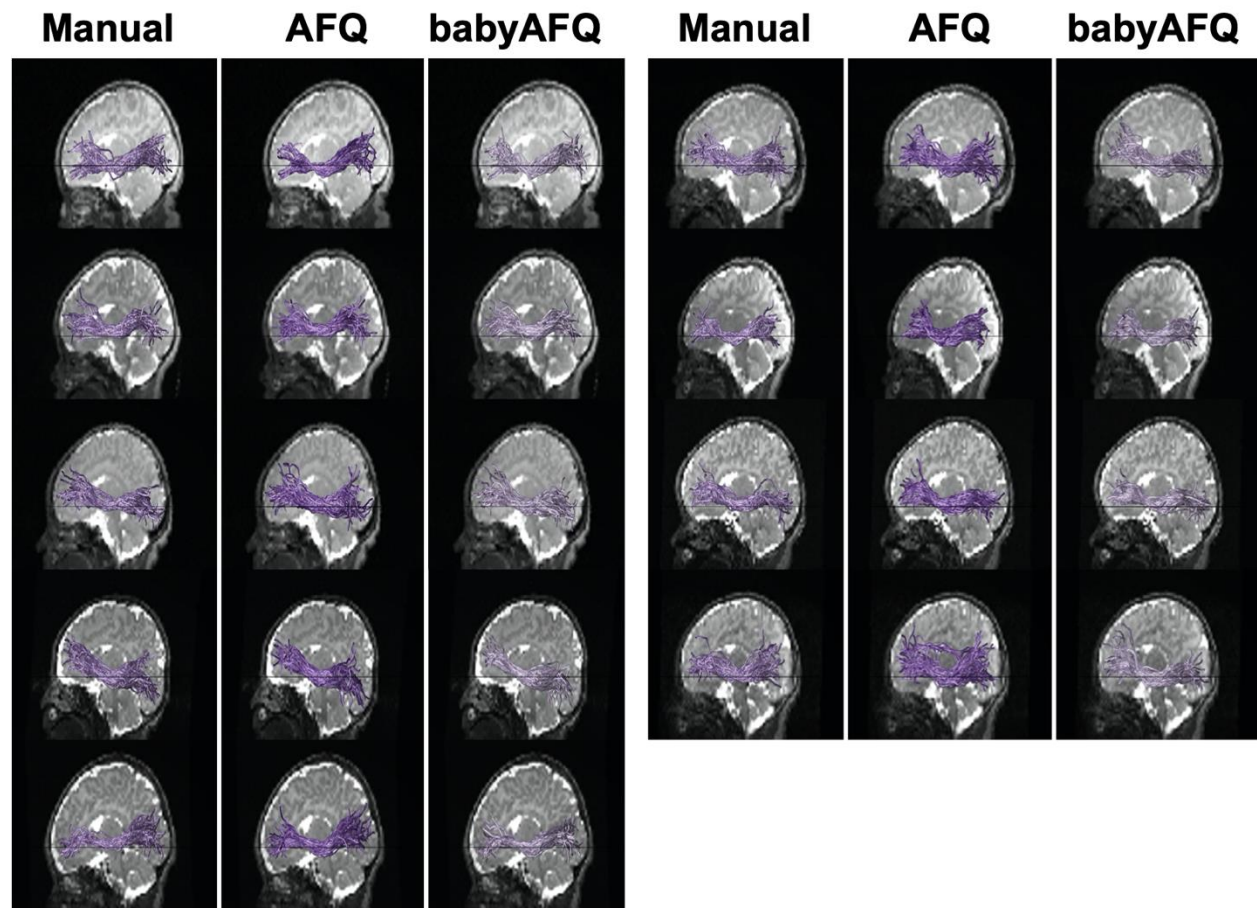

# Left Inferior Frontal Occipital Fasciculus

**3 months**

**6 months**

**AFQ babyAFQ AFQ babyAFQ AFQ babyAFQ AFQ babyAFQ**

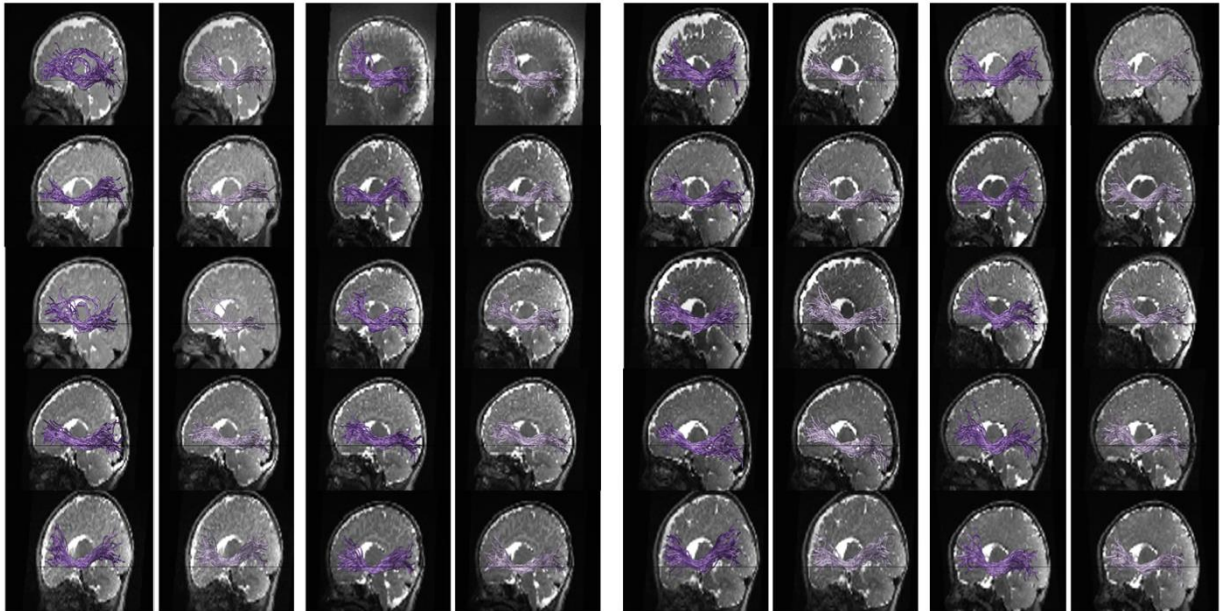

# Right Inferior Frontal Occipital Fasciculus Newborn

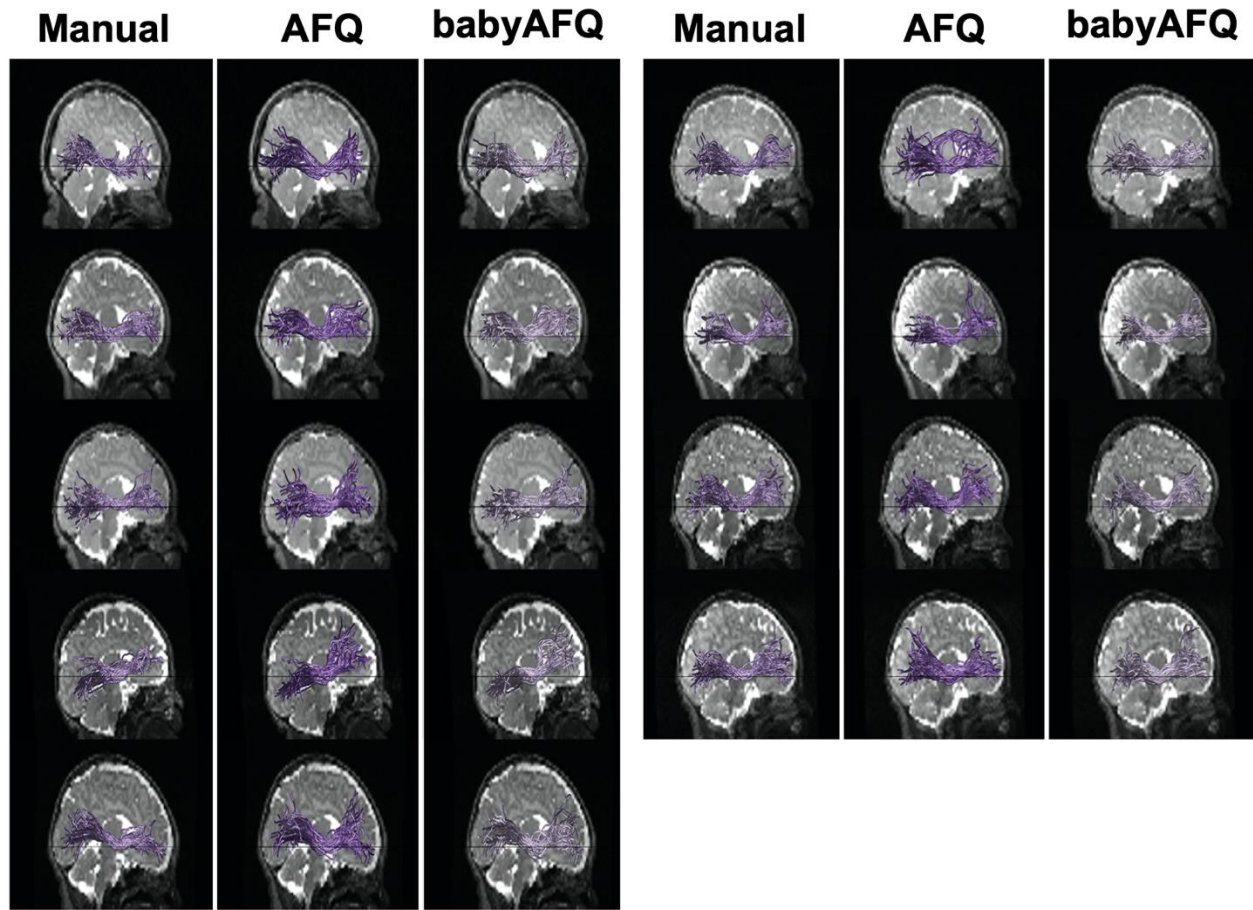

# Right Inferior Frontal Occipital Fasciculus

3 months

6 months

AFQ babyAFQ AFQ babyAFQ AFQ babyAFQ AFQ babyAFQ

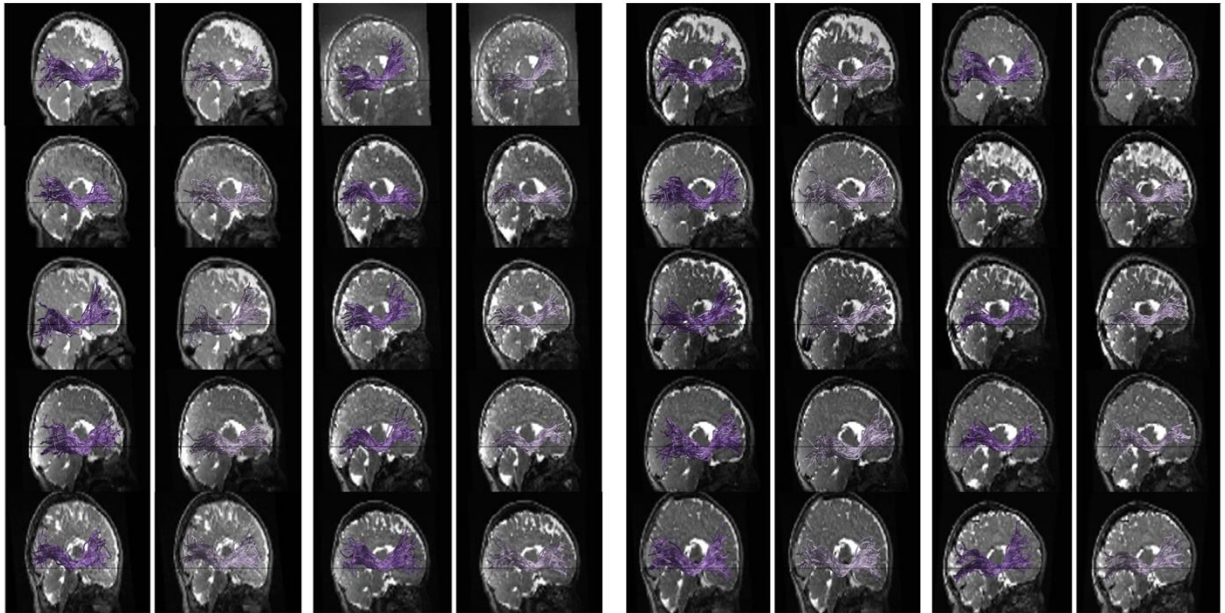

# Left Inferior Longitudinal Fasciculus Newborn

Manual

AFQ

babyAFQ

Manual

AFQ

babyAFQ

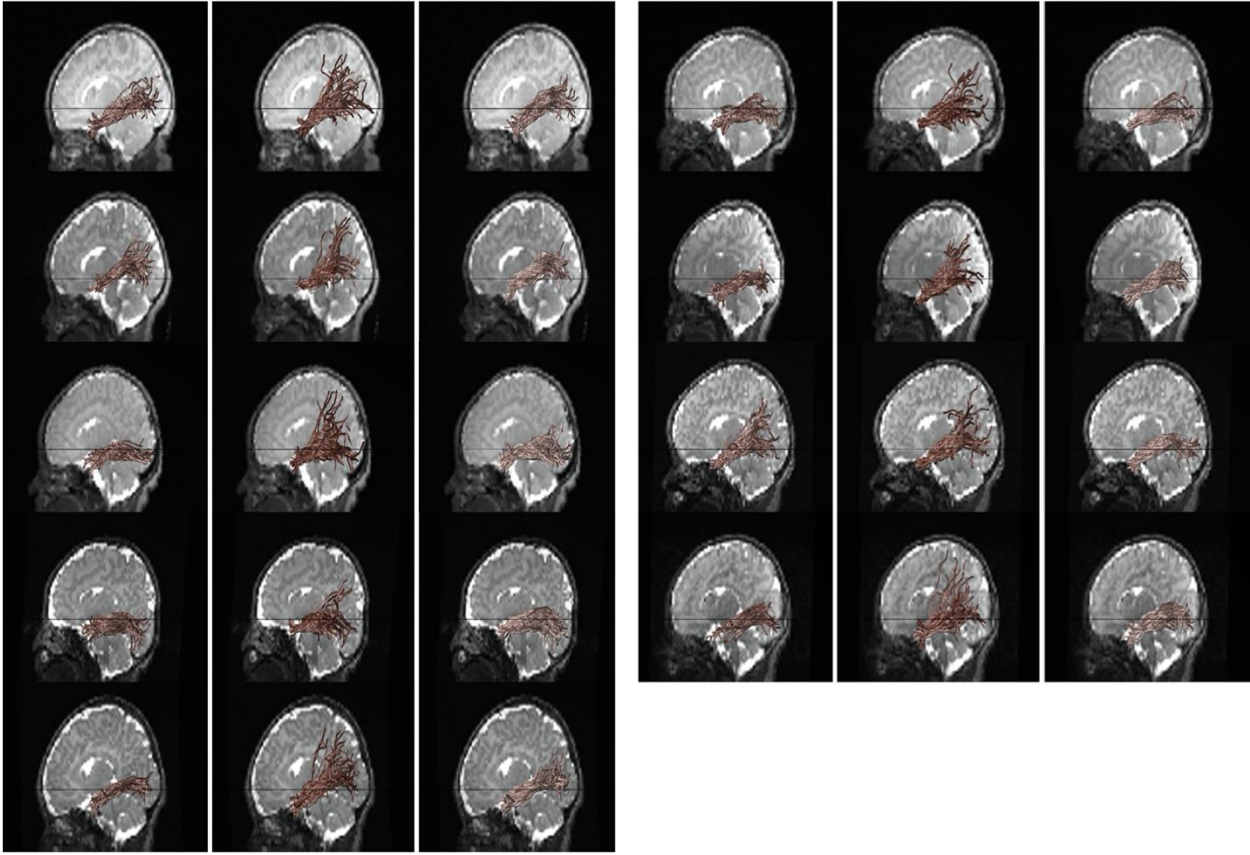

# Left Inferior Longitudinal Fasciculus

3 months

6 months

AFQ babyAFQ AFQ babyAFQ AFQ babyAFQ AFQ babyAFQ

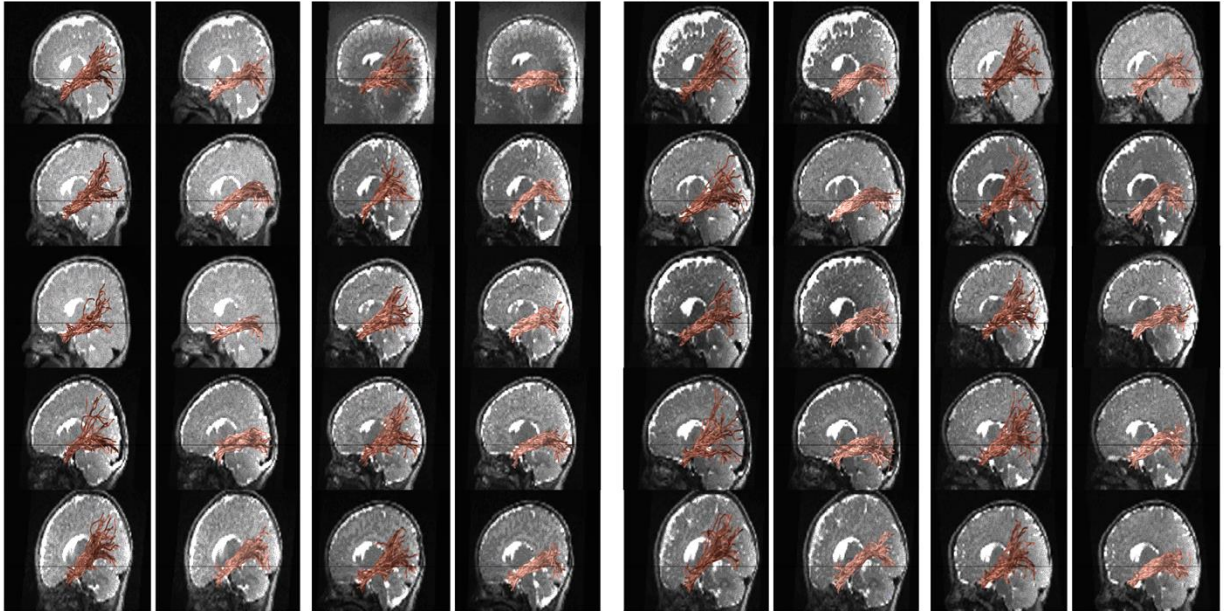

# Right Inferior Longitudinal Fasciculus Newborn

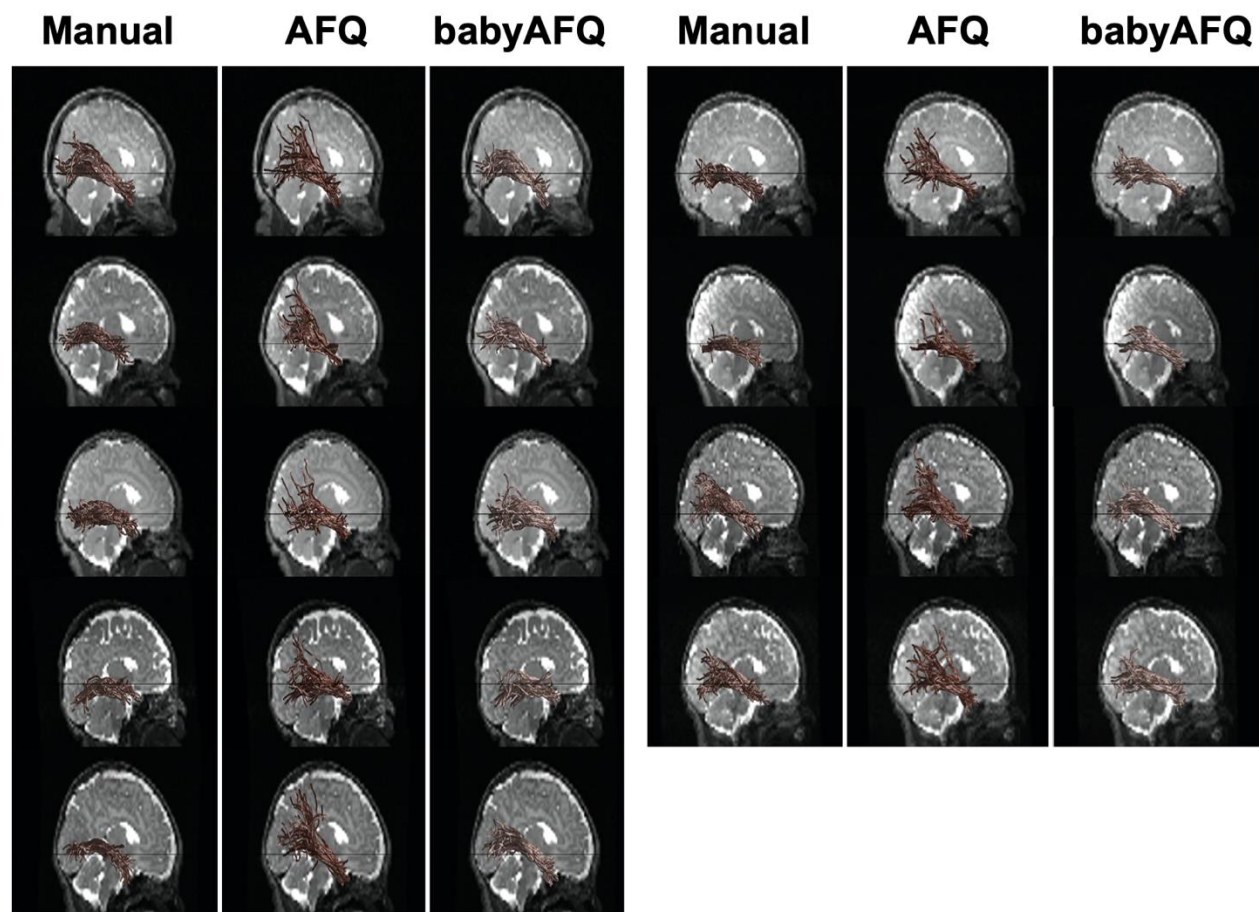

# Right Inferior Longitudinal Fasciculus

3 months

6 months

AFQ babyAFQ AFQ babyAFQ AFQ babyAFQ AFQ babyAFQ

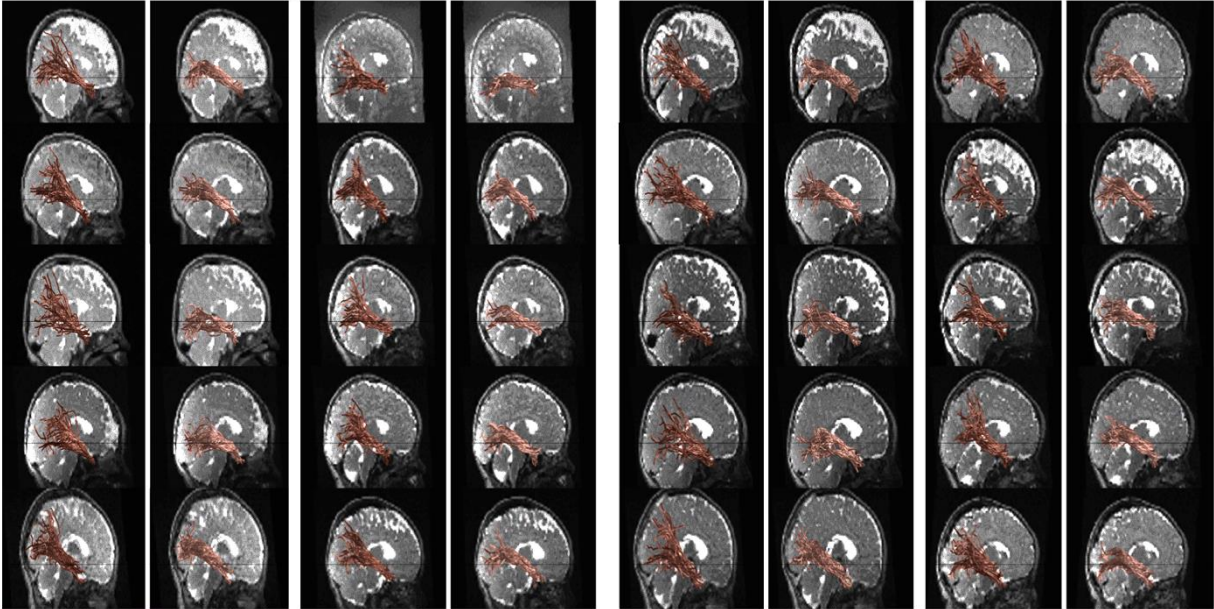



# Left Middle Longitudinal Fasciculus

**Newborn**

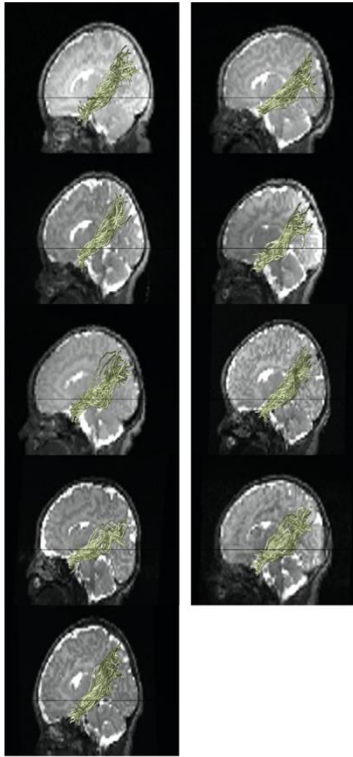

**3 months**

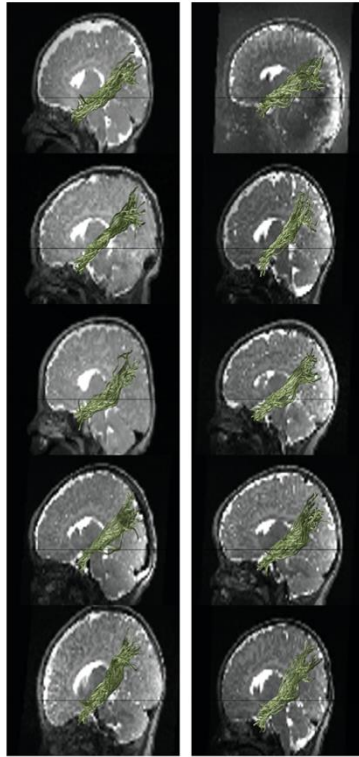

**6 months**

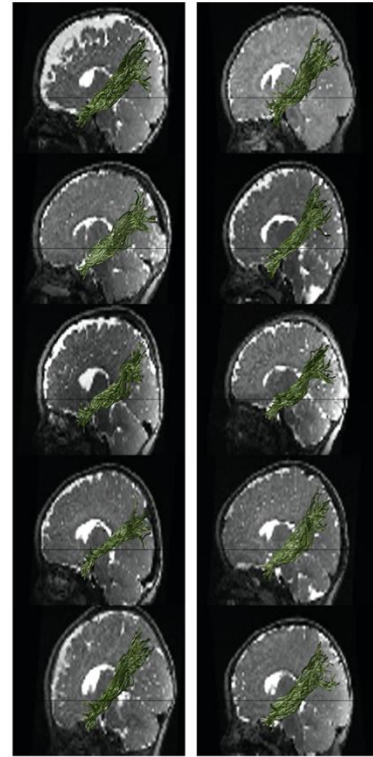

# Right Middle Longitudinal Fasciculus

Newborn

3 months

6 months

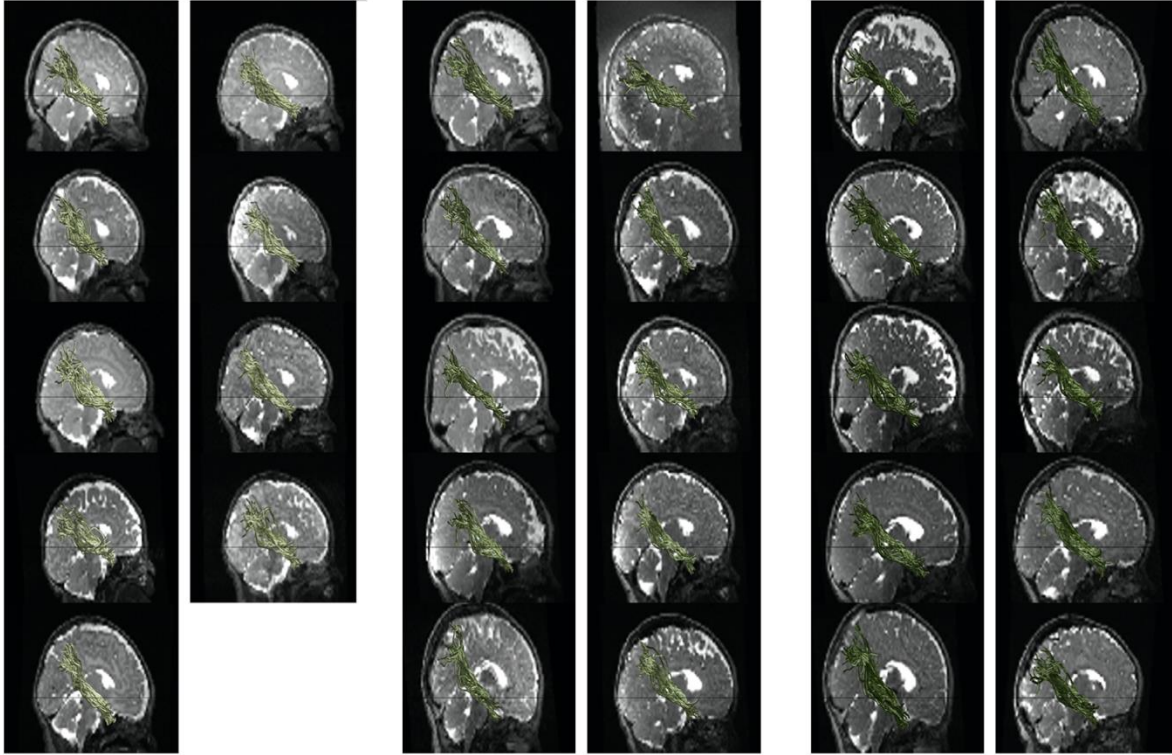

# Left Superior Longitudinal Fasciculus Newborn

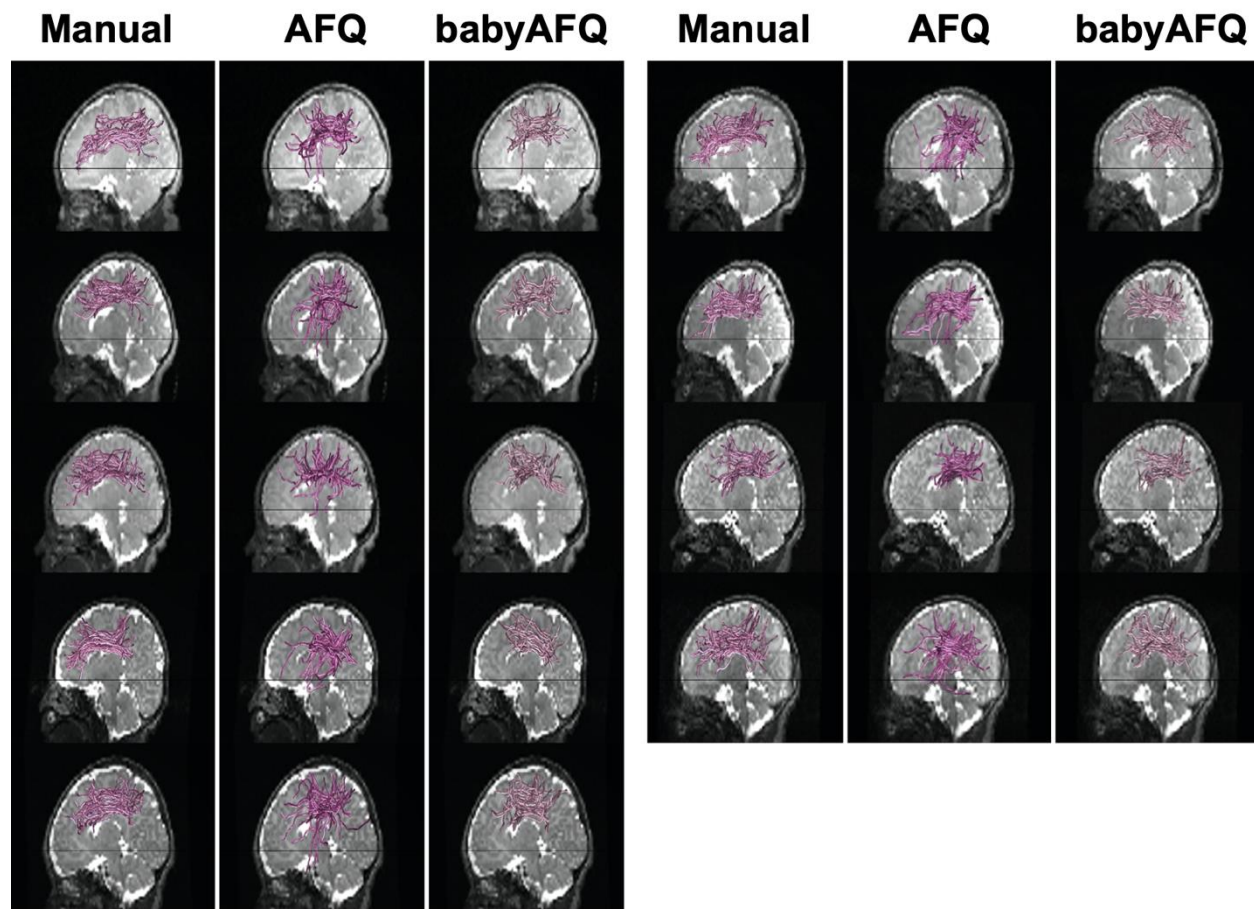

# Left Superior Longitudinal Fasciculus

3 months

6 months

AFQ babyAFQ AFQ babyAFQ AFQ babyAFQ AFQ babyAFQ

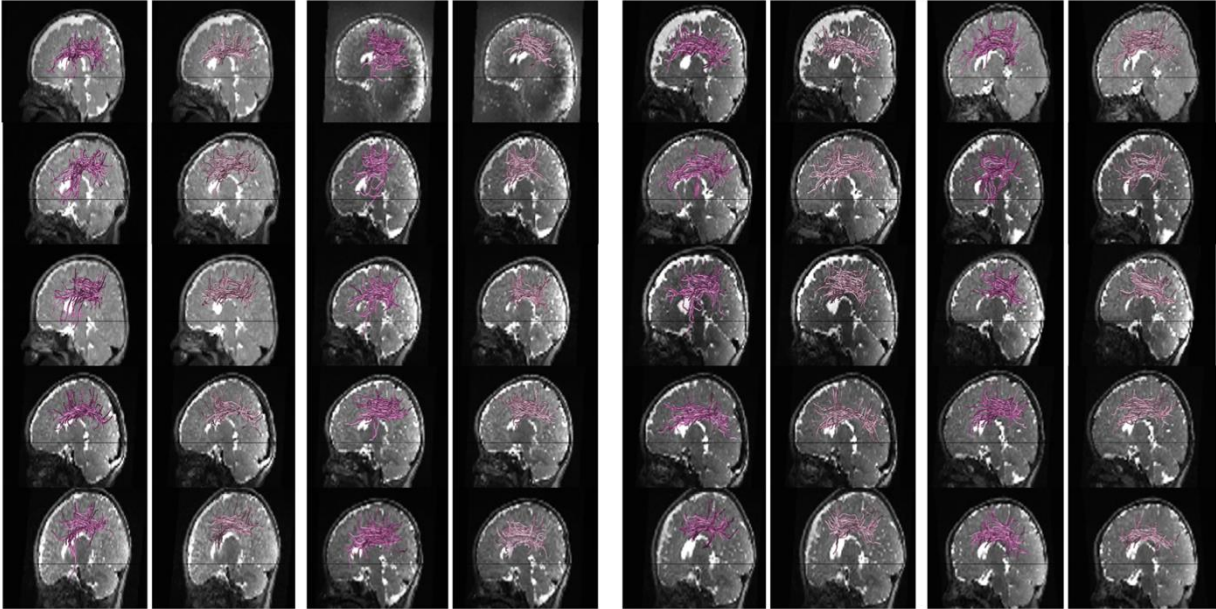

# Right Superior Longitudinal Fasciculus Newborn

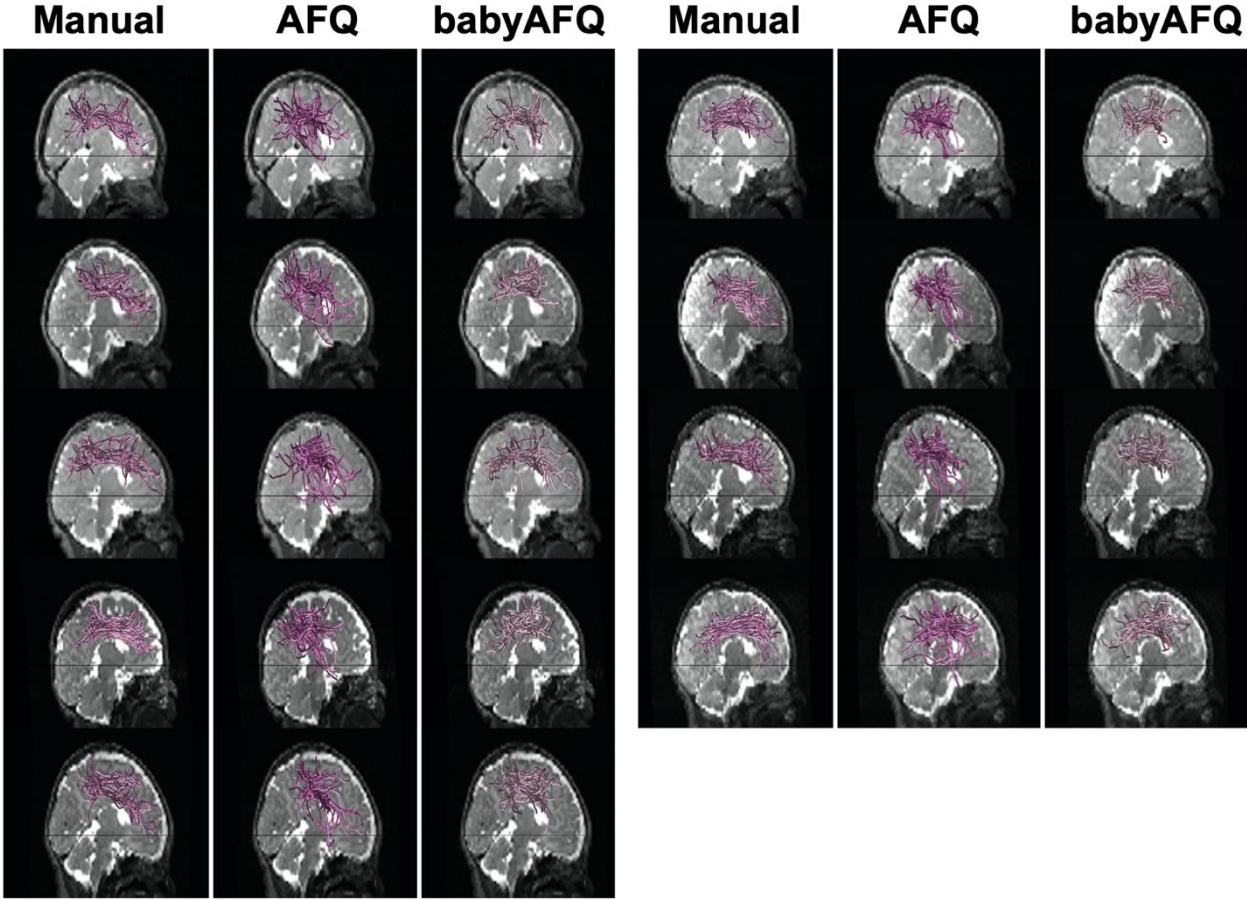

# Right Superior Longitudinal Fasciculus

3 months

6 months

AFQ babyAFQ AFQ babyAFQ AFQ babyAFQ AFQ babyAFQ

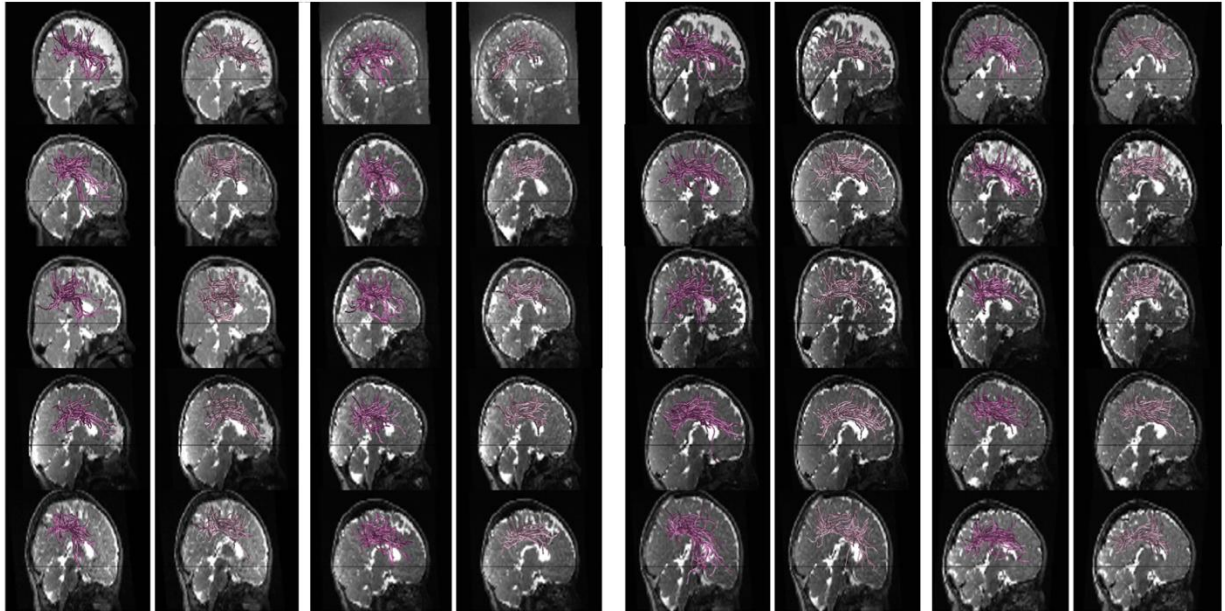

# Left Uncinate Fasciculus Newborn

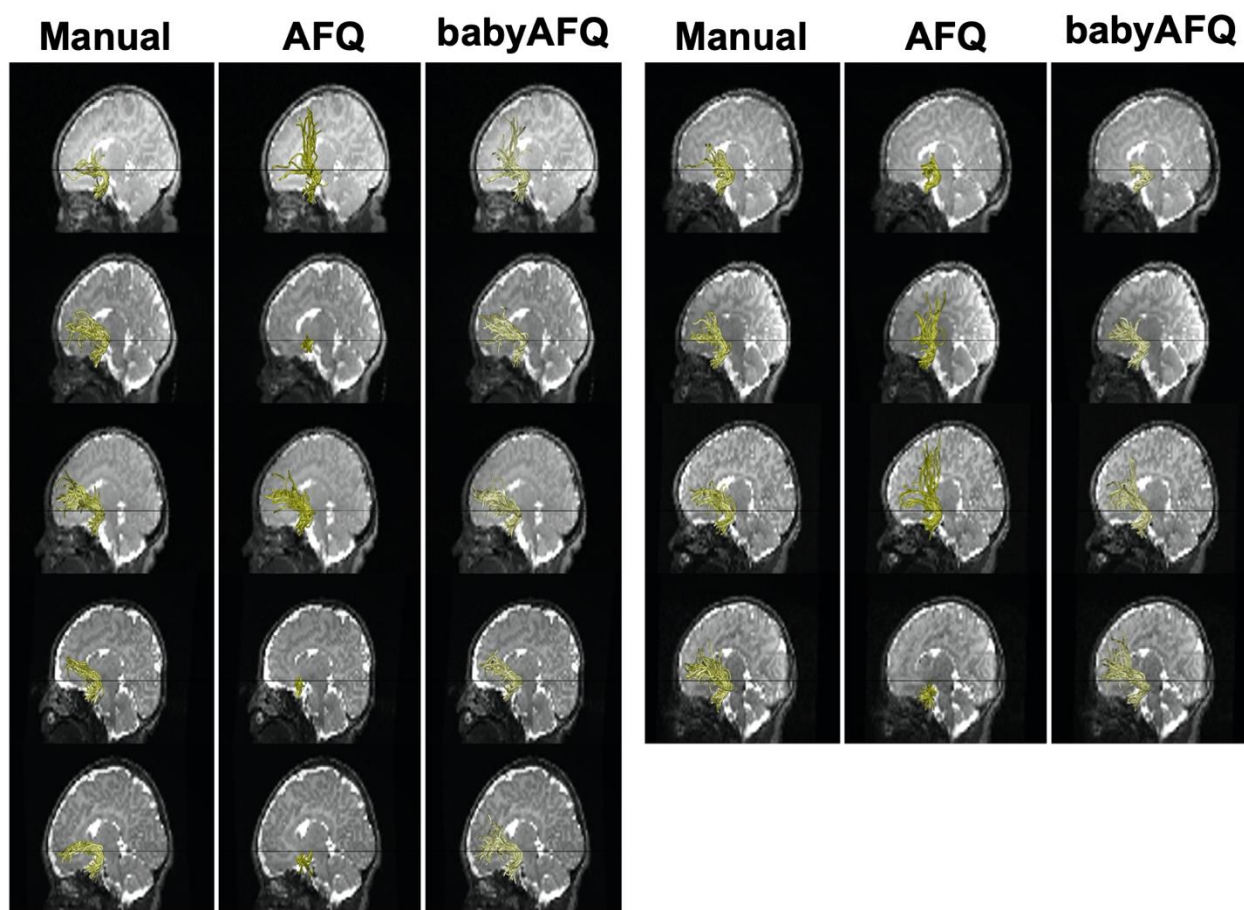

# Left Uncinate Fasciculus

3 months

6 months

AFQ babyAFQ AFQ babyAFQ AFQ babyAFQ AFQ babyAFQ

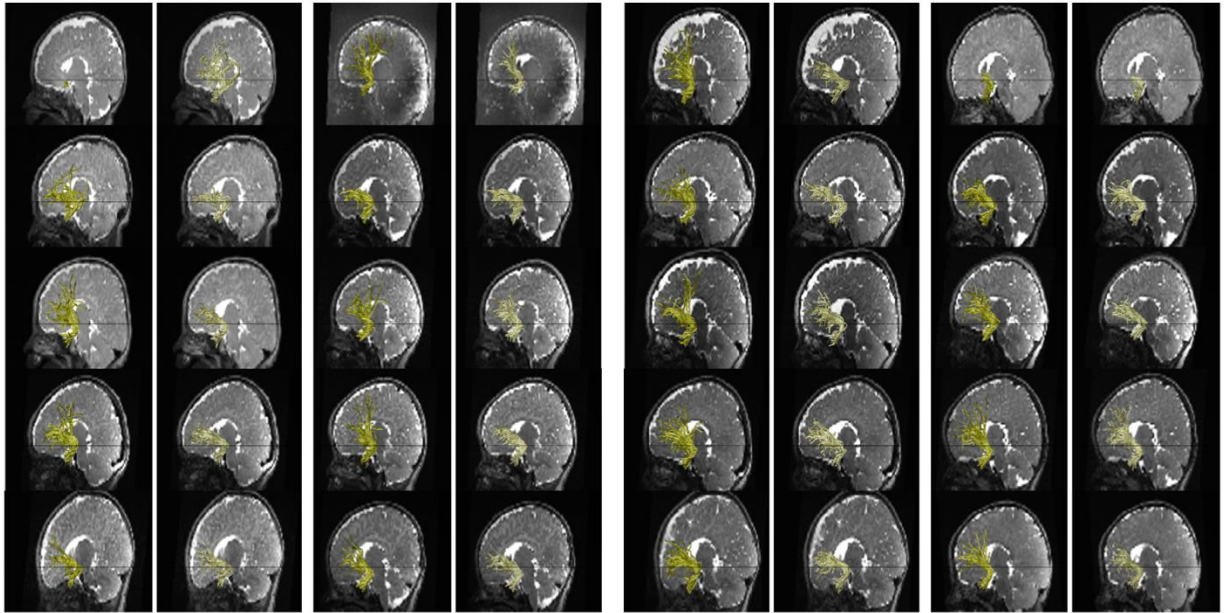



# Right Uncinate Fasciculus Newborn

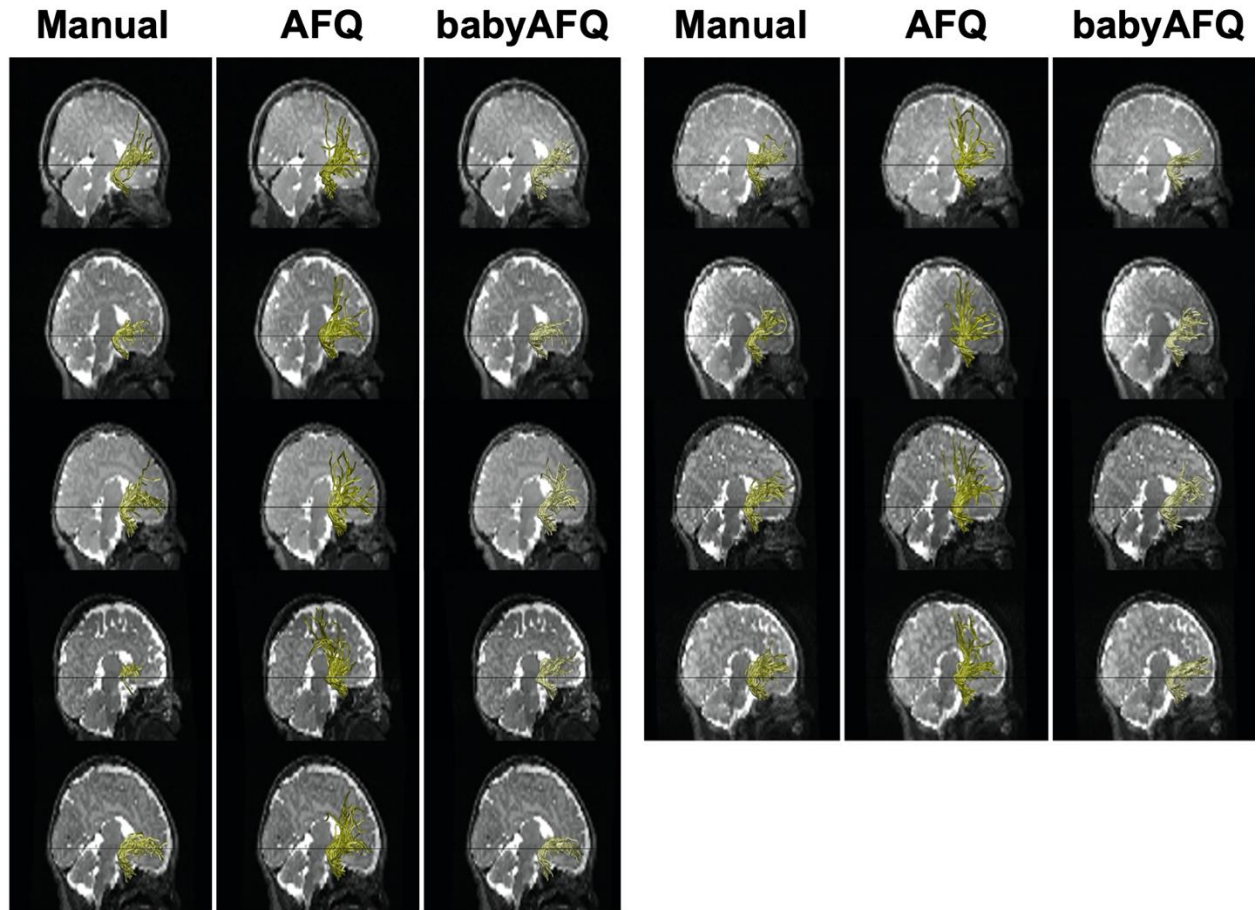

# Right Uncinate Fasciculus

3 months

6 months

AFQ babyAFQ AFQ babyAFQ AFQ babyAFQ AFQ babyAFQ

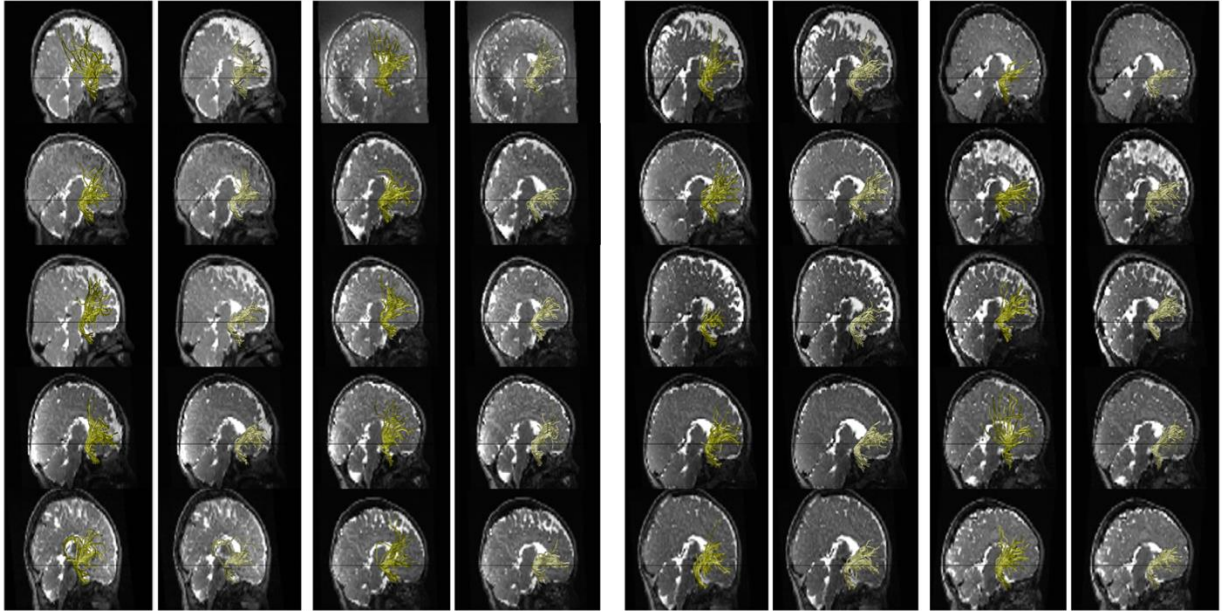

# Left Arcuate Fasciculus Newborn

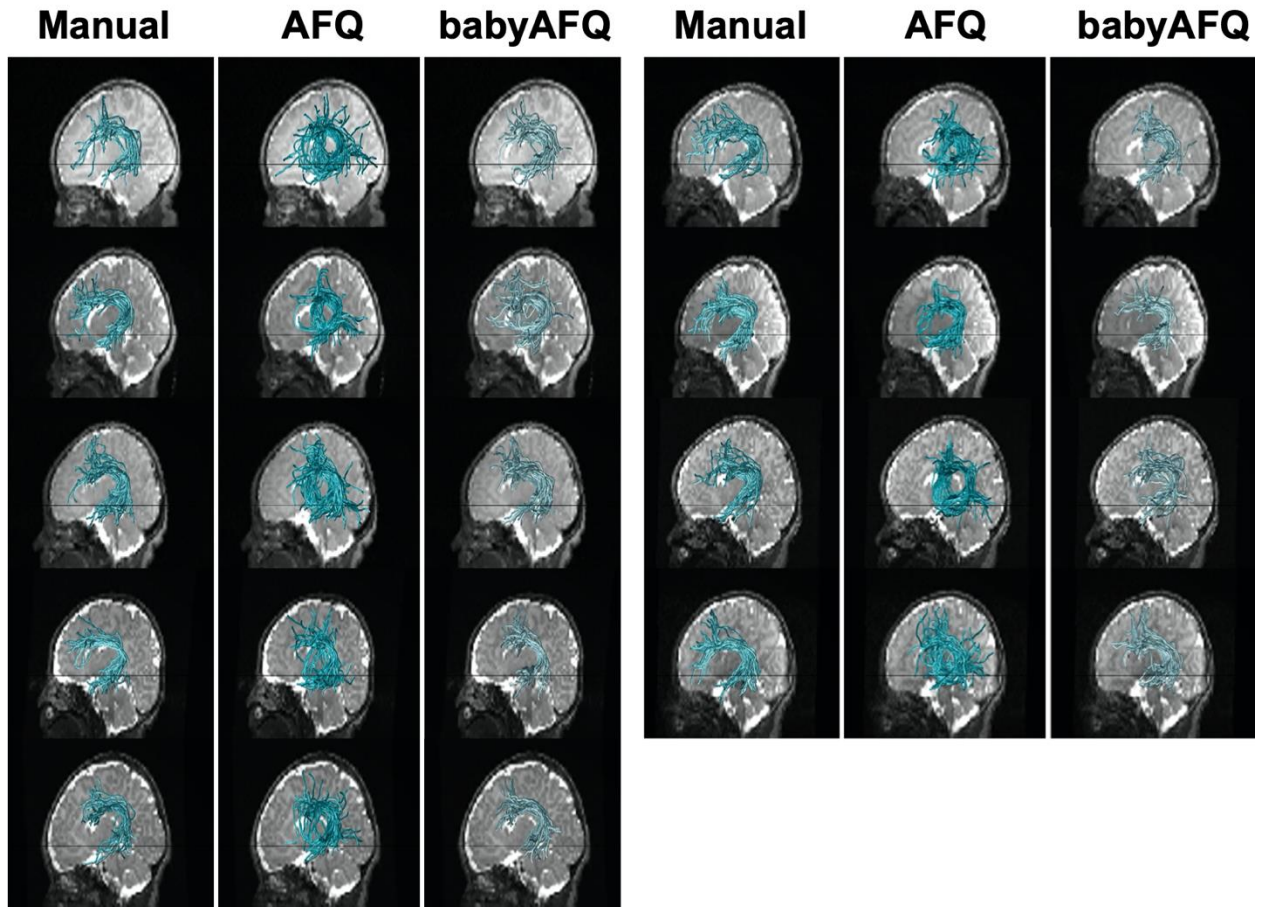

# Left Arcuate Fasciculus

3 months

6 months

AFQ babyAFQ AFQ babyAFQ AFQ babyAFQ AFQ babyAFQ

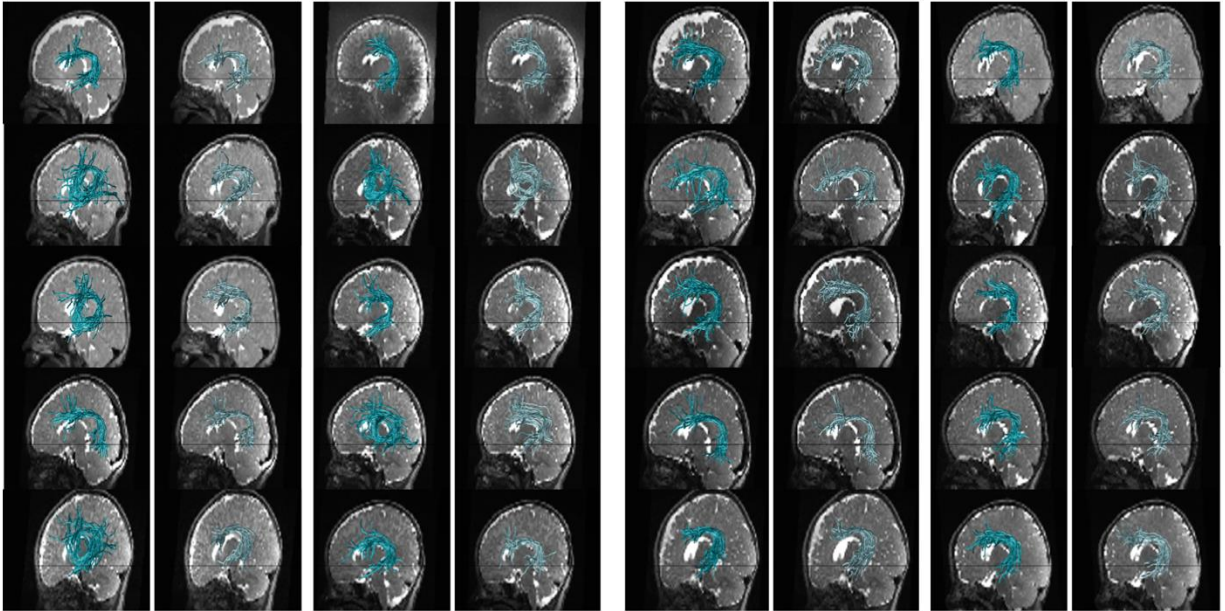

# Right Arcuate Fasciculus Newborn

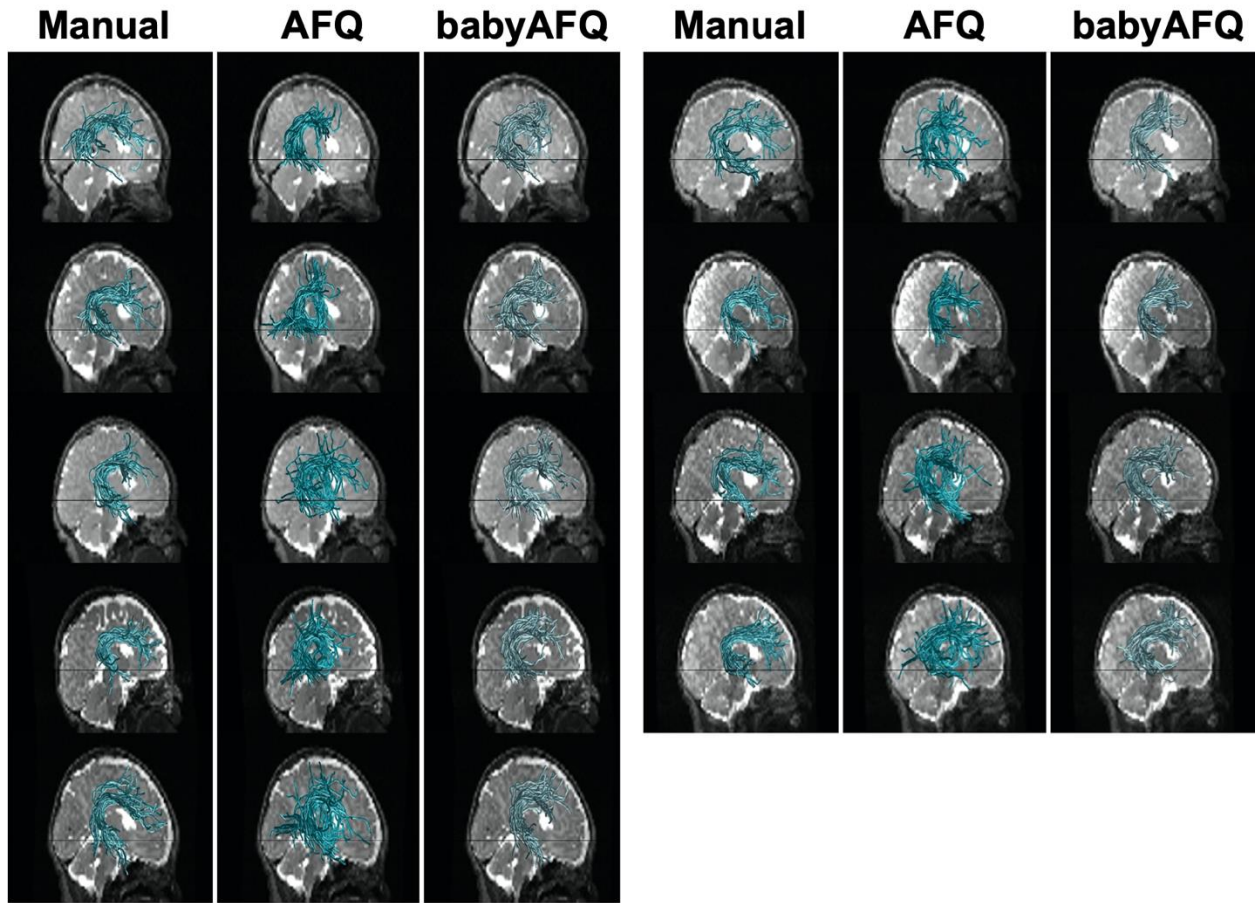

# Right Arcuate Fasciculus

3 months

6 months

AFQ babyAFQ AFQ babyAFQ AFQ babyAFQ AFQ babyAFQ

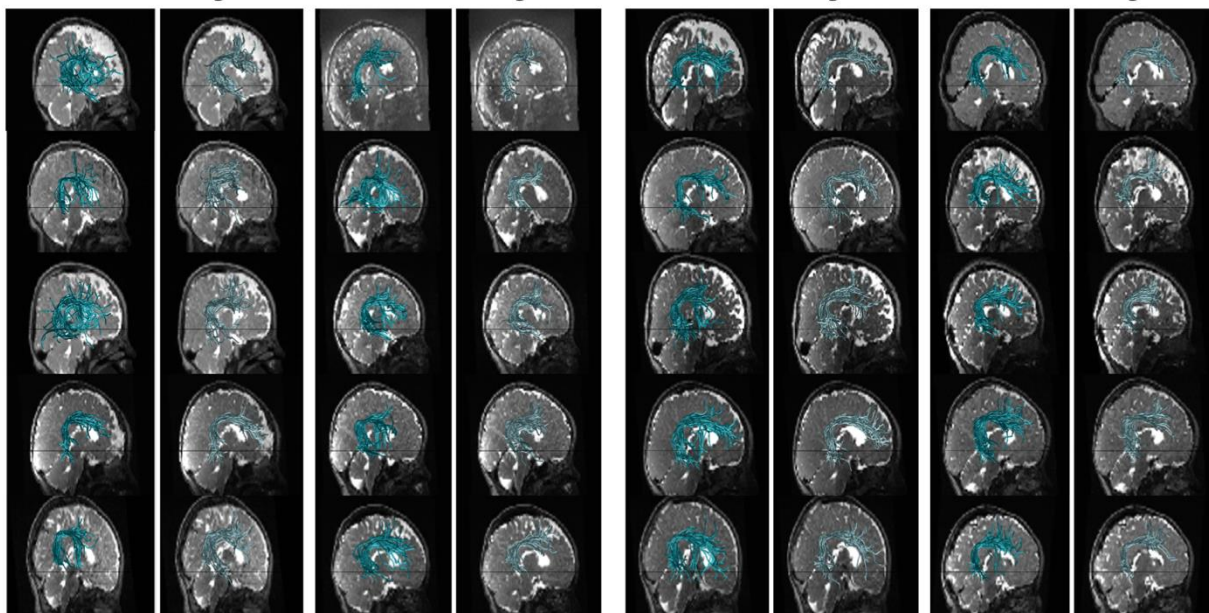

# Left Posterior Arcuate Fasciculus Newborn

Manual

AFQ

babyAFQ

Manual

AFQ

babyAFQ

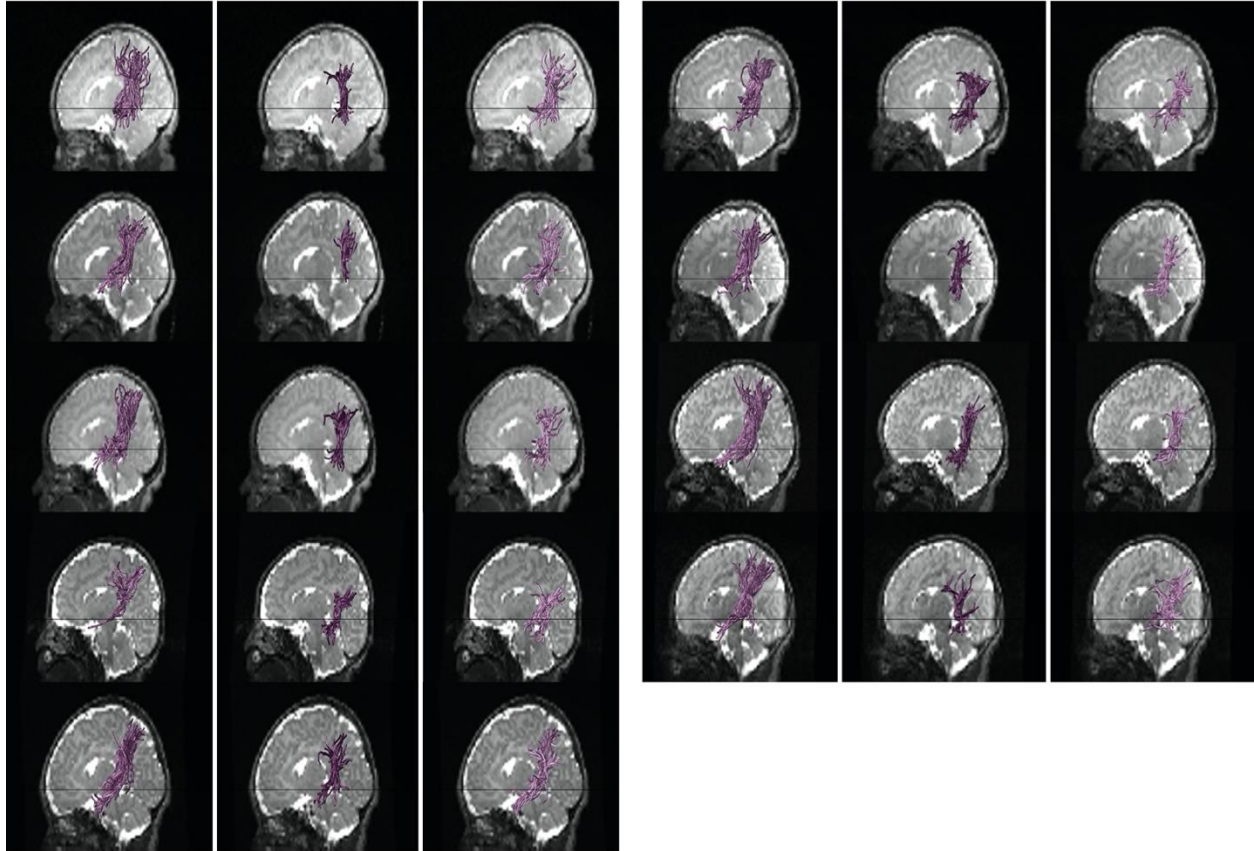

# Left Posterior Arcuate Fasciculus

3 months

6 months

AFQ babyAFQ AFQ babyAFQ AFQ babyAFQ AFQ babyAFQ

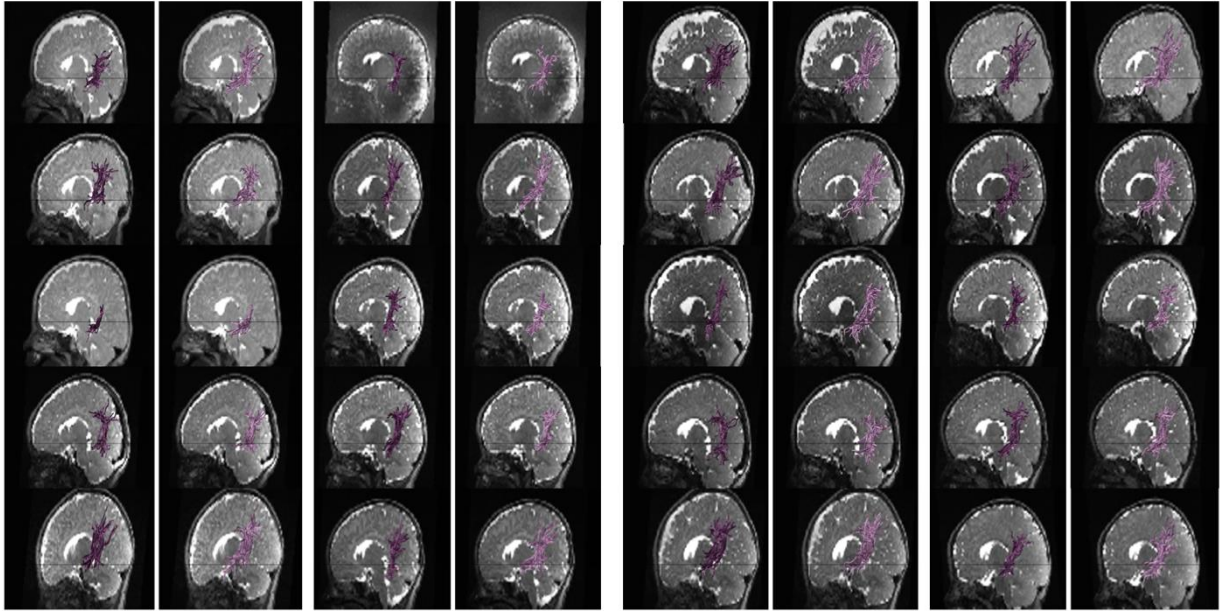



# Right Posterior Arcuate Fasciculus Newborn

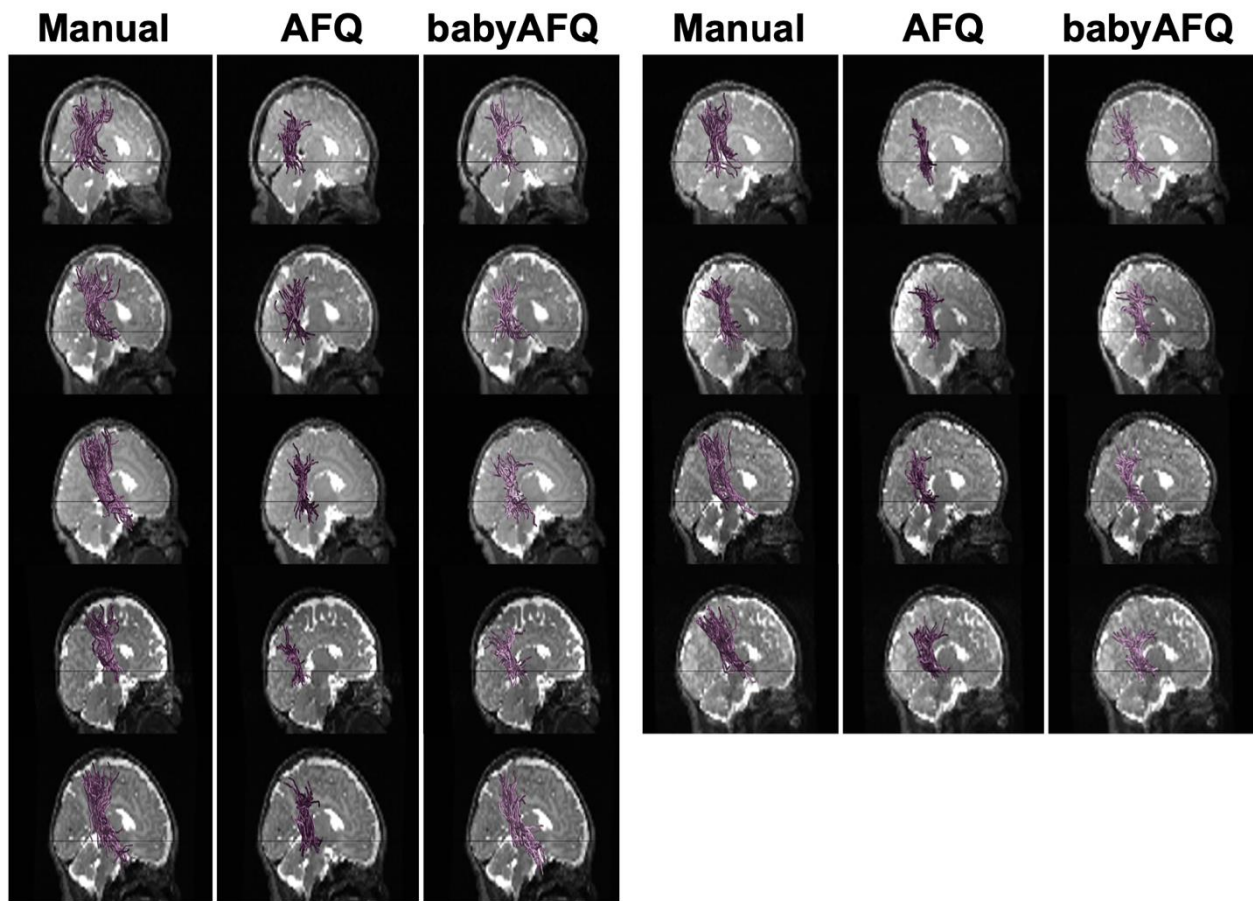

# Right Posterior Arcuate Fasciculus

3 months

6 months

AFQ babyAFQ AFQ babyAFQ AFQ babyAFQ AFQ babyAFQ

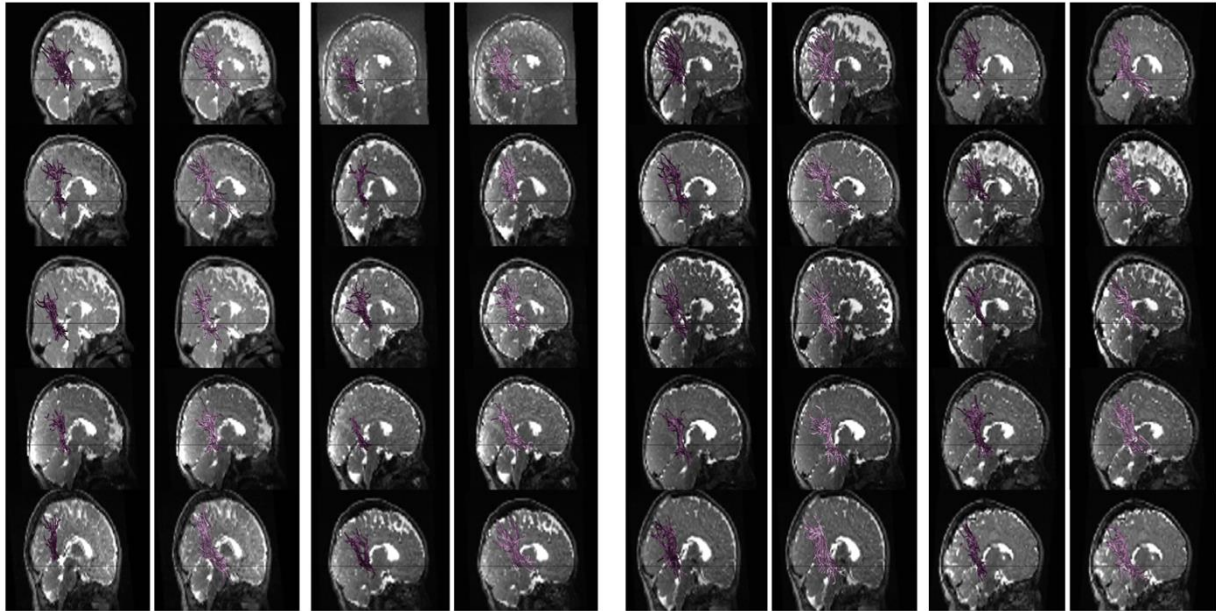

# Left Vertical Occipital Fasciculus Newborn

AFQ

babyAFQ

AFQ

babyAFQ

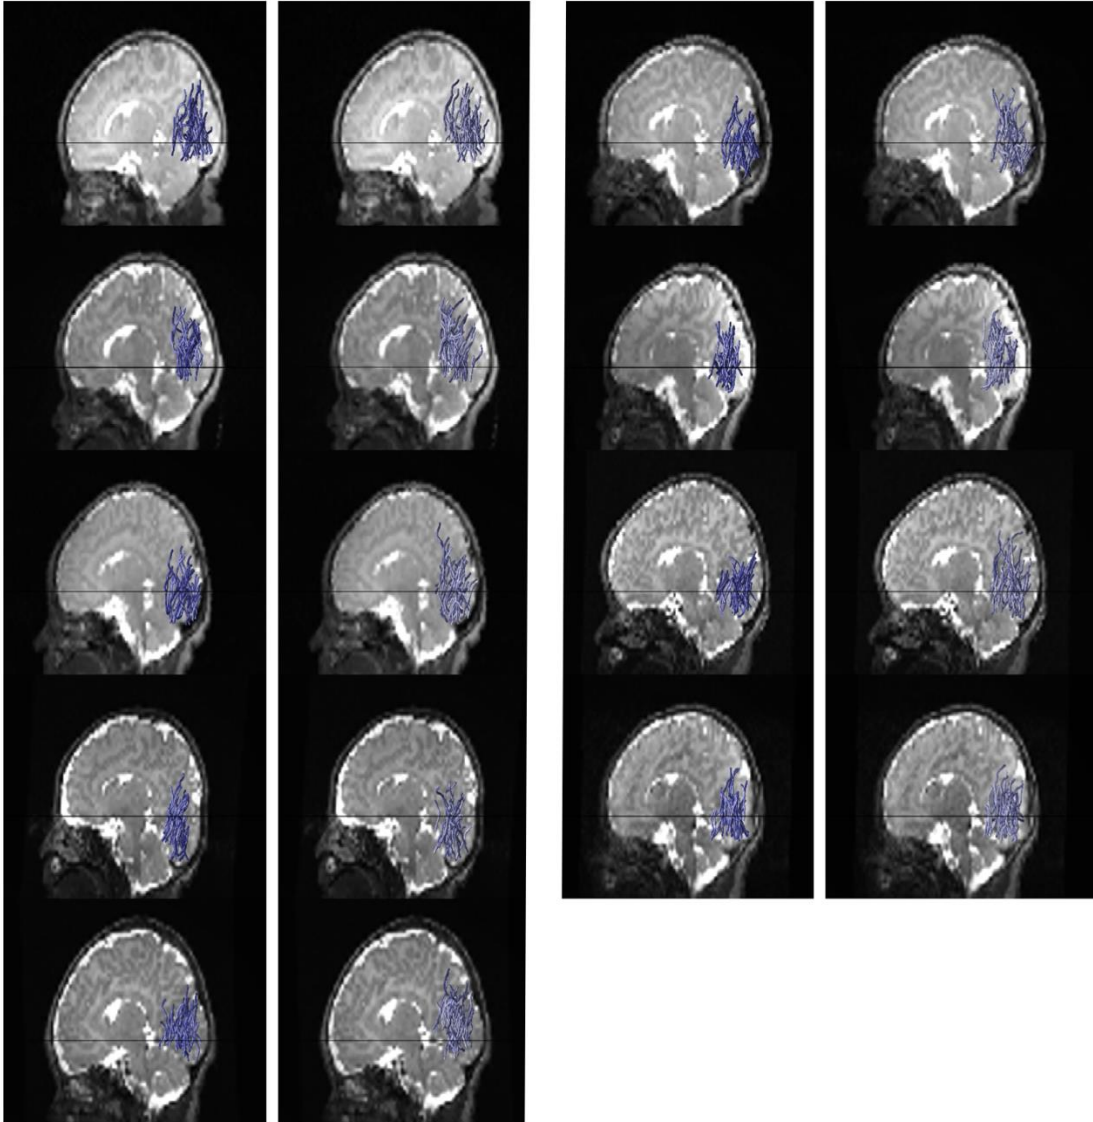

# Left Vertical Occipital Fasciculus

3 months

6 months

AFQ babyAFQ AFQ babyAFQ

AFQ babyAFQ AFQ babyAFQ

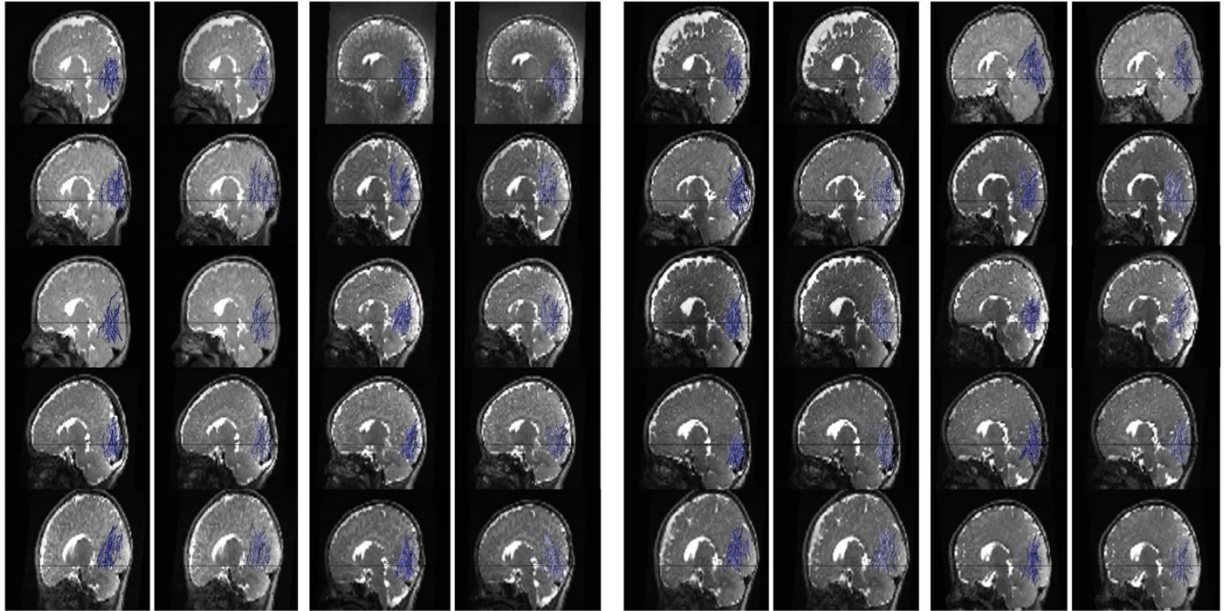

# Right Vertical Occipital Fasciculus Newborn

AFQ

babyAFQ

AFQ

babyAFQ

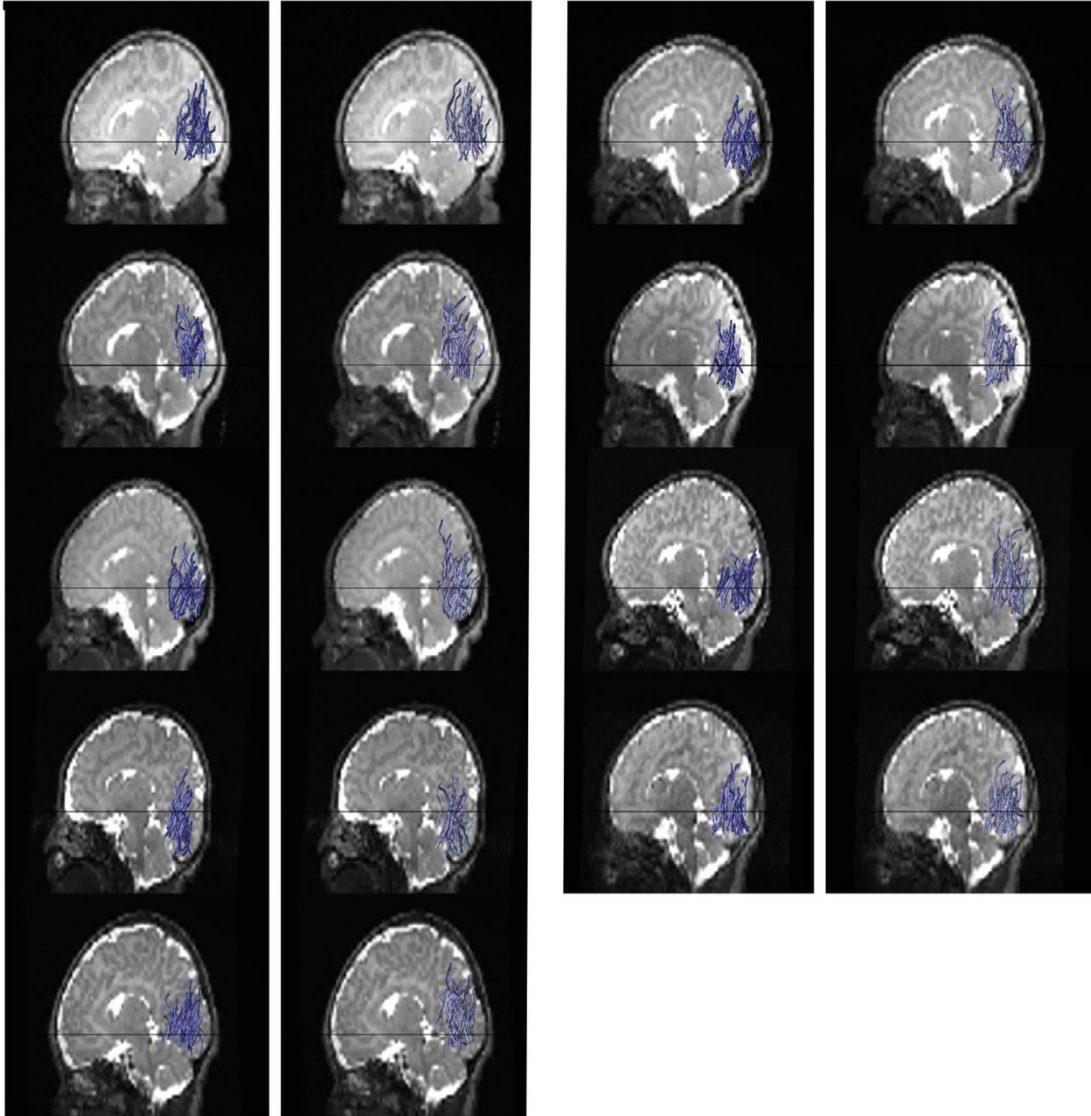

# Right Vertical Occipital Fasciculus

3 months

6 months

AFQ babyAFQ AFQ babyAFQ AFQ babyAFQ AFQ babyAFQ

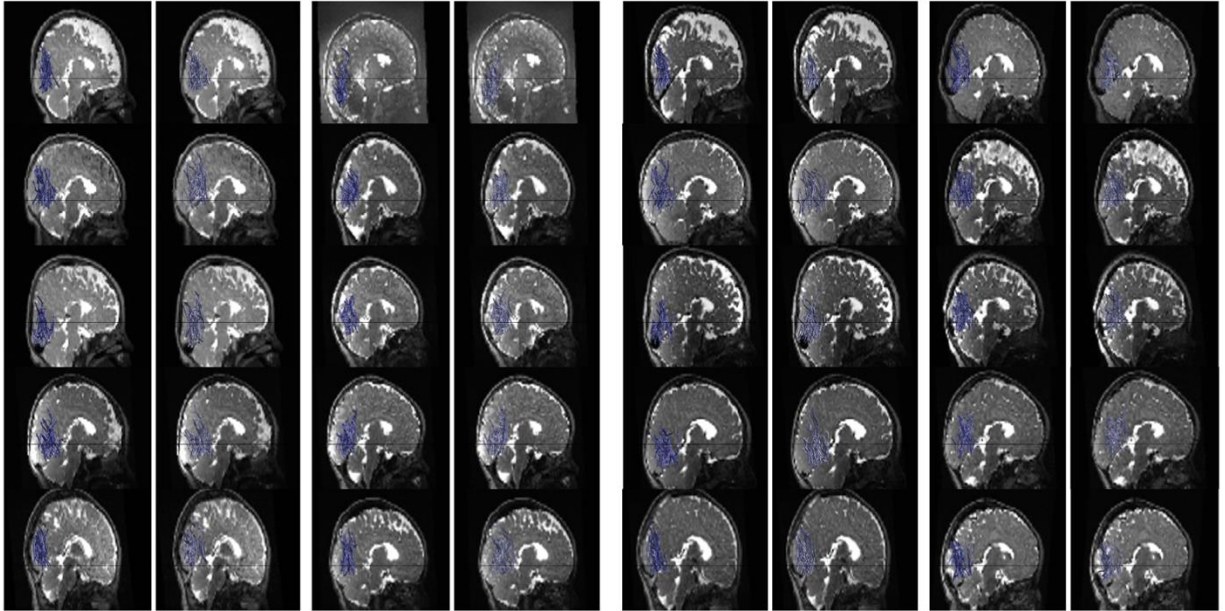

Supplement: 41467_2022_28326_MOESM1_ESM.pdf [file 41467_2022_28326_MOESM1_ESM.pdf]
